# Supplementary material for: An efficient 3-acylquinoline synthesis from acetophenones and anthranilviaC(sp3)–H bond activation mediated by Selectfluor
Source: Royal Society of Chemistry journal article supplement (doi:10.1039/c9ra01481k), 2019-01-01

# **An Efficient 3-Acylquinoline Synthesis from Acetophenones and Anthranil via C(sp<sup>3</sup>)-H Bond Activation Mediated by Selectfluor**

Yejun Gao<sup>a,b</sup>, Robert C Hider<sup>c</sup> and Yongmin Ma<sup>a,b\*</sup>

<sup>a</sup>School of Pharmaceutical and Chemical Engineering, Taizhou University, Taizhou 318000, P R China

<sup>b</sup>School of Pharmaceutical Science, Zhejiang Chinese Medical University, Hangzhou, 310053, P R China

<sup>c</sup>Institute of Pharmaceutical Science, King's College London, Franklin-Wilkins Building, Stamford Street, London, SE1 9NH, UK

\*Corresponding author. Email: [yongmin.ma@tzc.edu.cn](mailto:yongmin.ma@tzc.edu.cn)

## SUPPORTING INFORMATION

### Experimental Section

All reagents and solvents were used from commercial sources unless otherwise stated. All raw materials are obtained from commercial sources or synthesized and used by themselves. All experiments were conducted in the air. Thin-layer chromatography (TLC) uses a pre-coated plate (silica gel 60 PF254, 0.25 mm or 0.5 mm). Column chromatography on silica gel (240-400 mesh) with petroleum ether and ethyl acetate as eluent. The  $^1\text{H}$  and  $^{13}\text{C}$  NMR spectra of the 200/400/600 MHz and 50/100/125 MHz NMR spectrometers were recorded in  $\text{CDCl}_3/\text{DMSO-d}_6$ , respectively. Chemical changes are reported as  $\delta$  peaks. Uncorrected melting point. Mass spectra were obtained using an LC-MS (ESI) mass or GC-MS mass spectrometer.

### Procedures

Selectfluor (390mg, 1.1 mmol), acetophenone (120 mg, 1 mmol) and anthranil (120 mg, 1 mmol) were added to a solution of DMSO (3.0 mL), the reaction mixture was stirred in a tube at  $100\text{ }^\circ\text{C}$  for 24 h. The reaction was monitored by TLC. Once the reaction was completed, the reaction mixture was treated with  $\text{H}_2\text{O}$  (15.0 mL) and EtOAc (8.0 mL). The organic and aqueous layers were then separated, and the aqueous layer was extracted with EtOAc (3 x 8 mL). The combined organic extracts were dried ( $\text{Na}_2\text{SO}_4$ ), then the solvent was removed under reduced pressure and the remaining residue was purified by column chromatography. Compound **3aa** (166 mg, 71% yield) was obtained as a white solid. (3a as an Example)

### Phenyl(quinolin-3-yl)methanone (3aa)

White solid; mp 73-75 °C (lit. value<sup>1</sup> 74-75 °C). <sup>1</sup>H NMR (500 MHz, CDCl<sub>3</sub>) δ 9.33 (d, *J* = 2.2 Hz, 1H), 8.58 (d, *J* = 2.1 Hz, 1H), 8.22 (d, *J* = 8.5 Hz, 1H), 7.94 (dd, *J* = 8.1, 1.4 Hz, 1H), 7.86 – 7.88 (m, 3H), 7.69 – 7.64 (m, 2H), 7.57 – 7.53 (m, 2H). <sup>13</sup>C NMR (126 MHz, CDCl<sub>3</sub>) δ 194.84, 150.27, 149.36, 138.93, 137.03, 133.11, 131.93, 130.11, 130.05, 129.43, 129.18, 128.68, 127.66, 126.66. EI-MS: *m/z* [M+H]<sup>+</sup> 234.

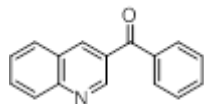

3aa

### (2-Methoxyphenyl)(quinolin-3-yl)methanone (3ba)

Yellow solid; mp 73-75 °C. <sup>1</sup>H NMR (400 MHz, CDCl<sub>3</sub>) δ 9.30 (d, *J* = 2.1 Hz, 1H), 8.63 – 8.59 (m, 1H), 8.24 – 8.19 (m, 1H), 7.99 – 7.94 (m, 1H), 7.89 – 7.86 (m, 1H), 7.68 – 7.55 (m, 3H), 7.17 (td, *J* = 7.5, 0.9 Hz, 1H), 7.08 (d, *J* = 8.4 Hz, 1H), 3.75 (s, 3H). <sup>13</sup>C NMR (101 MHz, CDCl<sub>3</sub>) δ 194.77, 157.59, 150.47, 149.48, 138.57, 133.04, 131.82, 130.62, 130.25, 129.43, 129.33, 127.84, 127.34, 127.03, 121.01, 111.55, 55.58. HRMS (ESI): calcd. for C<sub>17</sub>H<sub>14</sub>NO<sub>2</sub> [M + H]<sup>+</sup> 264.1019; found 264.1008.

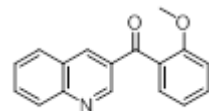

3ba

### Quinolin-3-yl(o-tolyl)methanone (3ca)

Light yellow oil. <sup>1</sup>H NMR (500 MHz, CDCl<sub>3</sub>) δ 9.36 (d, *J* = 2.2 Hz, 1H), 8.51 (d, *J* = 2.1 Hz, 1H), 8.22 (d, *J* = 8.5 Hz, 1H), 7.92 – 7.85 (m, 2H), 7.62 – 7.66 (m, 1H), 7.48 (td, *J* = 7.5, 1.5 Hz, 1H), 7.41 – 7.36 (m, 2H), 7.33 – 7.29 (m, 1H), 2.41 (s, 3H). <sup>13</sup>C NMR (126 MHz, CDCl<sub>3</sub>) δ 196.85, 150.15, 149.45, 139.59, 137.50, 137.35, 132.27, 131.49, 131.04, 130.23, 129.40, 129.32, 128.91, 127.69, 126.78, 125.52, 20.17. HRMS (ESI): calcd. for C<sub>17</sub>H<sub>14</sub>NO [M + H]<sup>+</sup> 248.1070; found 248.1077.

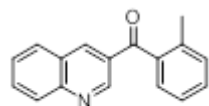

3ca

### (2-Bromophenyl)(quinolin-3-yl)methanone (3da)

White solid; mp 131-133 °C (lit. value<sup>2</sup> 130-132 °C). <sup>1</sup>H NMR (400 MHz, CDCl<sub>3</sub>) δ 9.39 (d, *J* = 2.1 Hz, 1H), 8.54 (d, *J* = 2.2 Hz, 1H), 8.24 (d, *J* = 8.5 Hz, 1H), 7.97 – 7.89 (m, 2H), 7.78 – 7.74 (m, 1H), 7.68 (ddd, *J* = 8.1, 6.9, 1.1 Hz, 1H), 7.53 (dd, *J* = 6.7, 1.1 Hz, 1H), 7.49 (dt, *J* = 7.4, 1.4 Hz, 2H). <sup>13</sup>C NMR (101 MHz, CDCl<sub>3</sub>) δ 194.53, 149.98, 149.75, 139.80, 139.74, 133.52, 132.55, 131.90, 129.56, 129.44, 129.33, 128.68, 127.75, 127.63, 126.83, 119.68. EI-MS: *m/z* [M+H]<sup>+</sup> 312.

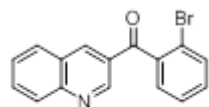

3da

### (3-Methoxyphenyl)(quinolin-3-yl)methanone (3ga)

Yellow oil<sup>2</sup>. <sup>1</sup>H NMR (400 MHz, CDCl<sub>3</sub>) δ 9.38 (d, *J* = 2.1 Hz, 1H), 8.64 (d, *J* = 2.2 Hz, 1H), 8.27 (d, *J* = 8.5 Hz, 1H), 8.02 – 7.97 (m, 1H), 7.94 – 7.89 (m, 1H), 7.73 – 7.69 (m, 1H), 7.50 – 7.44 (m, 3H), 7.27 – 7.23 (m, 1H), 3.93 (s, 3H). <sup>13</sup>C NMR (101 MHz, CDCl<sub>3</sub>) δ 194.58, 159.91, 150.13, 149.17, 139.07,

138.30, 132.04, 130.20, 129.63, 129.30, 129.21, 127.73, 126.68, 122.85, 119.62, 114.24, 55.56.  
EI-MS:  $m/z$   $[M+H]^+$  264.

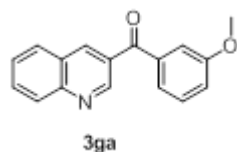

#### Quinolin-3-yl(m-tolyl)methanone (3ha)

Light yellow oil.  $^1H$  NMR (400 MHz,  $CDCl_3$ )  $\delta$  9.37 (d,  $J = 2.1$  Hz, 1H), 8.64 (d,  $J = 2.1$  Hz, 1H), 8.27 (d,  $J = 8.5$  Hz, 1H), 7.99 (dd,  $J = 8.2, 1.4$  Hz, 1H), 7.94 – 7.91 (m, 1H), 7.75 – 7.68 (m, 3H), 7.52 – 7.48 (m, 2H), 2.50 (s, 3H).  $^{13}C$  NMR (101 MHz,  $CDCl_3$ )  $\delta$  195.01, 150.23, 149.21, 138.98, 138.68, 137.07, 133.92, 131.95, 130.46, 130.34, 129.34, 129.20, 128.50, 127.67, 127.37, 126.74, 21.40. HRMS (ESI): calcd. for  $C_{17}H_{14}NO$   $[M + H]^+$  248.1070; found 248.1067.

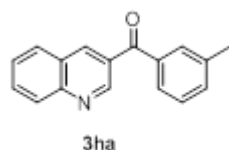

#### (3-Fluorophenyl)(quinolin-3-yl)methanone (3ia)

Light yellow oil.  $^1H$  NMR (400 MHz,  $CDCl_3$ )  $\delta$  9.37 (d,  $J = 2.2$  Hz, 1H), 8.62 (d,  $J = 2.2$  Hz, 1H), 8.27 (d,  $J = 8.5$  Hz, 1H), 7.99 (dd,  $J = 8.2, 1.4$  Hz, 1H), 7.93 (ddd,  $J = 8.4, 6.9, 1.4$  Hz, 1H), 7.74 – 7.66 (m, 2H), 7.65 – 7.55 (m, 2H), 7.43 – 7.39 (m, 1H).  $^{13}C$  NMR (101 MHz,  $CDCl_3$ )  $\delta$  193.45, 163.22 (d,  $J_{C-F} = 248$  Hz), 150.02, 149.45, 139.02, 132.21, 130.41 (d,  $J_{C-F} = 8$  Hz), 129.60, 129.45, 129.24, 127.84, 126.59, 125.86, 120.18 (d,  $J = 21$  Hz), 116.84 (d,  $J = 22$  Hz). HRMS (ESI): calcd. for  $C_{16}H_{11}FNO$   $[M + H]^+$  252.0819; found 252.0839.

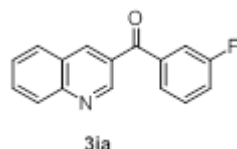

#### (3-Chlorophenyl)(quinolin-3-yl)methanone (3ja)

Light yellow oil.  $^1H$  NMR (500 MHz,  $CDCl_3$ )  $\delta$  9.32 (d,  $J = 2.1$  Hz, 1H), 8.57 (d,  $J = 2.2$ , 1H), 8.25 – 8.20 (m, 1H), 7.96 (dd,  $J = 8.2, 1.4$  Hz, 1H), 7.91 – 7.85 (m, 2H), 7.75 – 7.71 (m, 1H), 7.68 – 7.65 (m, 1H), 7.64 – 7.62 (m, 1H), 7.52 – 7.48 (m, 1H).  $^{13}C$  NMR (126 MHz,  $CDCl_3$ )  $\delta$  193.44, 149.98, 149.45, 139.05, 138.63, 135.07, 133.06, 132.25, 130.00, 129.86, 129.52, 129.44, 129.26, 128.09, 127.85, 126.59. HRMS (ESI): calcd. for  $C_{16}H_{11}ClNO$   $[M + H]^+$  268.0524; found 268.0512.

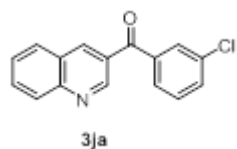

#### (3-Bromophenyl)(quinolin-3-yl)methanone (3ka)

Light yellow solid; mp 67-68 °C (lit. value<sup>2</sup> 67-69 °C).  $^1H$  NMR (400 MHz,  $CDCl_3$ )  $\delta$  9.37 (d,  $J = 2.1$  Hz, 1H), 8.63 (d,  $J = 2.1$  Hz, 1H), 8.28 (d,  $J = 8.5$  Hz, 1H), 8.06 (d,  $J = 1.8$  Hz, 1H), 8.03 – 7.99 (m, 1H), 7.96 – 7.92 (m, 1H), 7.86 – 7.80 (m, 2H), 7.75 – 7.71 (m, 1H), 7.48 (t,  $J = 7.9$  Hz, 1H).  $^{13}C$  NMR (101 MHz,  $CDCl_3$ )  $\delta$  193.32, 149.94, 149.41, 139.13, 138.85, 136.00, 132.77, 132.30, 130.25, 129.52, 129.42, 129.29, 128.54, 127.90, 126.64, 123.06. EI-MS:  $m/z$   $[M+H]^+$  312.

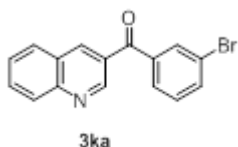

#### (4-Methoxyphenyl)(quinolin-3-yl)methanone (3ma)

White solid; mp 102-104 °C (lit. value<sup>3</sup> 103-105 °C). <sup>1</sup>H NMR (500 MHz, CDCl<sub>3</sub>) δ 9.28 (d, *J* = 2.2 Hz, 1H), 8.54 (d, *J* = 2.2 Hz, 1H), 8.21 (dd, *J* = 8.5, 1.0 Hz, 1H), 7.93 (dd, *J* = 8.1, 1.3 Hz, 1H), 7.91 – 7.88 (m, 2H), 7.87 – 7.84 (m, 1H), 7.67 – 7.63 (m, 1H), 7.05 – 6.99 (m, 2H), 3.92 (s, 3H). <sup>13</sup>C NMR (126 MHz, CDCl<sub>3</sub>) δ 193.43, 163.75, 150.23, 149.17, 138.33, 132.58, 131.64, 130.84, 129.70, 129.40, 129.04, 127.57, 126.73, 113.96, 55.61. EI-MS: *m/z* [M+H]<sup>+</sup> 264.

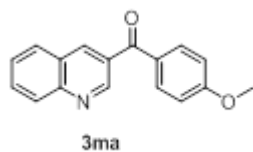

#### Quinolin-3-yl(p-tolyl)methanone (3na)

White solid; mp 88-89 °C (lit. value<sup>3</sup> 89-90 °C). <sup>1</sup>H NMR (500 MHz, CDCl<sub>3</sub>) δ 9.31 (d, *J* = 2.1 Hz, 1H), 8.56 (d, *J* = 2.2 Hz, 1H), 8.21 (d, *J* = 8.4 Hz, 1H), 7.93 (dd, *J* = 8.2, 1.3 Hz, 1H), 7.88 – 7.84 (m, 1H), 7.82 – 7.77 (m, 2H), 7.67 – 7.63 (m, 1H), 7.35 (d, *J* = 7.9 Hz, 2H), 2.48 (s, 3H). <sup>13</sup>C NMR (126 MHz, CDCl<sub>3</sub>) δ 194.50, 150.29, 149.26, 144.11, 138.70, 134.37, 131.78, 130.47, 130.29, 129.40, 129.37, 129.12, 127.60, 126.69, 21.75. EI-MS: *m/z* [M+H]<sup>+</sup> 248.

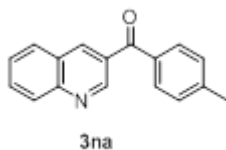

#### (4-Propylphenyl)(quinolin-3-yl)methanone (3oa)

Yellow oil. <sup>1</sup>H NMR (400 MHz, DMSO-*d*<sub>6</sub>) δ 9.22 (d, *J* = 2.2 Hz, 1H), 8.78 (d, *J* = 2.4 Hz, 1H), 8.23 (dd, *J* = 8.2, 1.4 Hz, 1H), 8.16 (dd, *J* = 8.4, 1.1 Hz, 1H), 7.98 – 7.94 (m, 1H), 7.87 – 7.82 (m, 2H), 7.78 – 7.74 (m, 1H), 7.47 (d, *J* = 8.1 Hz, 2H), 2.72 (t, *J* = 7.6 Hz, 2H), 1.75 – 1.63 (m, 2H), 0.97 (t, *J* = 7.3 Hz, 3H). <sup>13</sup>C NMR (101 MHz, DMSO-*d*<sub>6</sub>) δ 194.54, 150.24, 149.19, 148.70, 138.91, 134.73, 132.40, 130.60, 130.43, 130.23, 129.26, 128.06, 126.72, 37.69, 24.21, 14.14. HRMS (ESI): calcd. for C<sub>19</sub>H<sub>18</sub>NO [M + H]<sup>+</sup> 276.1383; found 276.1371.

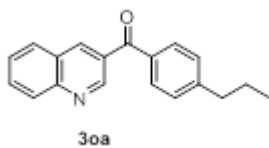

#### (4-Fluorophenyl)(quinolin-3-yl)methanone (3pa)

White solid; mp 80-81 °C (lit. value<sup>2</sup> 80-82 °C). <sup>1</sup>H NMR (400 MHz, CDCl<sub>3</sub>) δ 9.34 (d, *J* = 2.2 Hz, 1H), 8.59 (d, *J* = 2.2 Hz, 1H), 8.26 (d, *J* = 8.5 Hz, 1H), 8.00 – 7.91 (m, 4H), 7.74 – 7.69 (m, 1H), 7.27 (d, *J* = 8.5 Hz, 2H). <sup>13</sup>C NMR (101 MHz, CDCl<sub>3</sub>) δ 193.27, 165.79 (d, *J*<sub>C-F</sub> = 254 Hz), 150.02, 149.36, 138.71, 133.35, 132.69 (d, *J*<sub>C-F</sub> = 9 Hz), 132.03, 130.07, 129.44, 129.14, 127.78, 126.64, 115.94 (d, *J*<sub>C-F</sub> = 22 Hz). EI-MS: *m/z* [M+H]<sup>+</sup> 252.

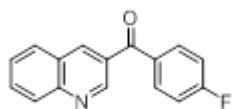

3pa

**(4-Chlorophenyl)(quinolin-3-yl)methanone (3qa)**

White solid; mp 105-106 °C (lit. value<sup>2</sup> 104-106 °C). <sup>1</sup>H NMR (500 MHz, CDCl<sub>3</sub>) δ 9.30 (d, *J* = 2.3 Hz, 1H), 8.54 (d, *J* = 2.2 Hz, 1H), 8.21 (d, *J* = 8.5 Hz, 1H), 7.93 (dd, *J* = 8.2, 1.4 Hz, 1H), 7.90 – 7.86 (m, 1H), 7.84 – 7.81 (m, 2H), 7.68 – 7.64 (m, 1H), 7.58 – 7.50 (m, 2H). <sup>13</sup>C NMR (126 MHz, CDCl<sub>3</sub>) δ 193.63, 150.07, 149.51, 139.68, 138.77, 135.33, 132.07, 131.42, 129.77, 129.52, 129.17, 129.05, 127.77, 126.58. EI-MS: *m/z* [M+H]<sup>+</sup> 268.

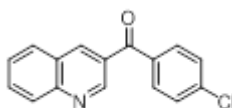

3qa

**(4-Bromophenyl)(quinolin-3-yl)methanone (3ra)**

White solid; mp 114-116 °C (lit. value<sup>3</sup> 115-117 °C). <sup>1</sup>H NMR (500 MHz, CDCl<sub>3</sub>) δ 9.30 (d, *J* = 2.2 Hz, 1H), 8.56 (d, *J* = 2.2 Hz, 1H), 8.25 – 8.20 (m, 1H), 7.94 (dd, *J* = 8.2, 1.4 Hz, 1H), 7.91 – 7.87 (m, 1H), 7.75 (dt, *J* = 6.6, 2.0 Hz, 2H), 7.71 – 7.67 (m, 3H). <sup>13</sup>C NMR (126 MHz, CDCl<sub>3</sub>) δ 193.68, 149.91, 149.26, 138.99, 135.70, 132.21, 132.05, 131.49, 129.72, 129.33, 129.19, 128.37, 127.87, 126.61. EI-MS: *m/z* [M+H]<sup>+</sup> 312.

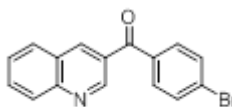

3ra

**(2,4-Dimethylphenyl)(quinolin-3-yl)methanone (3va)**

White solid; mp 118-120 °C. <sup>1</sup>H NMR (400 MHz, CDCl<sub>3</sub>) δ 9.38 (d, *J* = 2.1 Hz, 1H), 8.54 (d, *J* = 2.1 Hz, 1H), 8.24 (d, *J* = 8.5 Hz, 1H), 7.95 – 7.87 (m, 2H), 7.69 – 7.65 (m, 1H), 7.35 (d, *J* = 7.8 Hz, 1H), 7.23 (s, 1H), 7.14 (d, *J* = 7.8 Hz, 1H), 2.46 (s, 3H), 2.45 (s, 3H). <sup>13</sup>C NMR (101 MHz, CDCl<sub>3</sub>) δ 196.64, 150.30, 149.42, 141.64, 139.30, 137.93, 134.61, 132.40, 132.04, 130.76, 129.69, 129.34, 129.32, 127.59, 126.81, 126.11, 21.46, 20.27. HRMS (ESI): calcd. for C<sub>18</sub>H<sub>16</sub>NO [M + H]<sup>+</sup> 262.1226; found 262.1238.

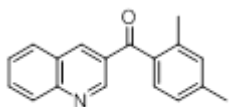

3va

**(3,5-Difluorophenyl)(quinolin-3-yl)methanone (3wa)**

White solid; mp 118-119 °C (lit. value<sup>2</sup> 118-120 °C). <sup>1</sup>H NMR (400 MHz, CDCl<sub>3</sub>) δ 9.36 (d, *J* = 2.2 Hz, 1H), 8.61 (d, *J* = 2.2 Hz, 1H), 8.26 (dd, *J* = 8.5, 1.1 Hz, 1H), 8.00 (dd, *J* = 8.2, 1.4 Hz, 1H), 7.96 – 7.92 (m, 1H), 7.75 – 7.71 (m, 1H), 7.47 – 7.39 (m, 2H), 7.18 – 7.14 (m, 1H). <sup>13</sup>C NMR (101 MHz, CDCl<sub>3</sub>) δ 192.18, 163.05 (d, *J*<sub>C-F</sub> = 260 Hz), 149.81, 149.66, 138.98, 132.40, 129.56, 129.28, 128.97, 127.95, 126.49, 112.94 (d, *J*<sub>C-F</sub> = 26 Hz), 112.94 (d, *J*<sub>C-F</sub> = 11 Hz), 108.40 (t, *J*<sub>C-F</sub> = 21 Hz). EI-MS: *m/z* [M+H]<sup>+</sup> 270.

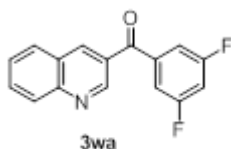

**(3-Bromo-4-fluorophenyl)(quinolin-3-yl)methanone (3wa)**

Yellow solid; mp 148-149 °C. <sup>1</sup>H NMR (400 MHz, CDCl<sub>3</sub>) δ 9.34 (d, *J* = 1.8 Hz, 1H), 8.67 – 8.59 (m, 1H), 8.29 (t, *J* = 7.9 Hz, 1H), 8.17 (dt, *J* = 6.5, 2.0 Hz, 1H), 8.05 – 7.92 (m, 2H), 7.89 – 7.85 (m, 1H), 7.79 – 7.70 (m, 1H), 7.37 – 7.31 (m, 1H). <sup>13</sup>C NMR (101 MHz, CDCl<sub>3</sub>) δ 192.07, 162.04 (d, *J*<sub>C-F</sub> = 254 Hz), 149.81, 149.47, 138.82, 135.67, 134.51, 132.27, 131.19 (d, *J*<sub>C-F</sub> = 8 Hz), 129.46, 129.21, 127.91, 126.57, 116.80 (d, *J*<sub>C-F</sub> = 23 Hz), 110.01 (d, *J*<sub>C-F</sub> = 21 Hz). HRMS (ESI): calcd. for C<sub>16</sub>H<sub>10</sub>BrFNO [M + H]<sup>+</sup> 329.9924; found 329.9911.

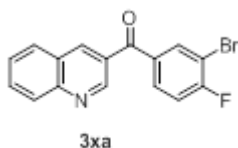

**(3,4-Dichlorophenyl)(quinolin-3-yl)methanone (3ya)**

Yellow solid; mp 115-116 °C (lit. value<sup>1</sup> 113-114 °C). <sup>1</sup>H NMR (400 MHz, CDCl<sub>3</sub>) δ 9.34 (d, *J* = 2.1 Hz, 1H), 8.61 (d, *J* = 2.2 Hz, 1H), 8.28 (d, *J* = 8.5 Hz, 1H), 8.05 – 7.98 (m, 2H), 8.00 – 7.92 (m, 1H), 7.75 – 7.66 (m, 3H). <sup>13</sup>C NMR (101 MHz, CDCl<sub>3</sub>) δ 192.37, 149.72, 149.44, 138.99, 137.86, 136.59, 133.55, 132.39, 131.76, 130.84, 129.43, 129.30, 129.24, 128.96, 127.97, 126.58. EI-MS: *m/z* [M+H]<sup>+</sup> 302.

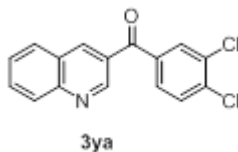

**Benzo[d][1,3]dioxol-5-yl(quinolin-3-yl)methanone (3za)**

White solid; mp 92-93 °C (lit. value<sup>3</sup> 92-94 °C). <sup>1</sup>H NMR (400 MHz, CDCl<sub>3</sub>) δ 9.31 (d, *J* = 2.1 Hz, 1H), 8.62 – 8.53 (m, 1H), 8.25 (d, *J* = 8.5 Hz, 1H), 8.02 – 7.86 (m, 2H), 7.69 (t, *J* = 7.5 Hz, 1H), 7.46 (d, *J* = 6.2 Hz, 2H), 6.95 (d, *J* = 8.2 Hz, 1H), 6.15 (s, 2H). <sup>13</sup>C NMR (101 MHz, CDCl<sub>3</sub>) δ 192.99, 152.17, 150.03, 149.04, 148.40, 138.48, 131.82, 131.46, 130.76, 129.30, 129.08, 127.70, 127.08, 109.71, 108.02, 102.10, 29.70. HRMS (ESI): calcd. for C<sub>17</sub>H<sub>12</sub>NO<sub>3</sub> [M + H]<sup>+</sup> 278.0812; found 278.0829.

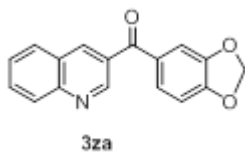

**Naphthalen-1-yl(quinolin-3-yl)methanone (3a'a)**

pale-yellow oil<sup>1</sup>. <sup>1</sup>H NMR (400 MHz, CDCl<sub>3</sub>) δ 9.49 – 9.44 (m, 1H), 8.68 – 8.66 (m, 1H), 8.33 (d, *J* = 8.3 Hz, 1H), 8.27 – 8.23 (m, 1H), 8.15 (d, *J* = 8.2 Hz, 1H), 8.05 – 8.01 (m, 1H), 7.95 (d, *J* = 7.6 Hz, 2H), 7.73 – 7.69 (m, 2H), 7.65 – 7.60 (m, 3H). <sup>13</sup>C NMR (101 MHz, CDCl<sub>3</sub>) δ 195.96, 149.92, 148.95, 140.17, 135.17, 133.92, 132.56, 132.28, 130.95, 130.87, 129.45, 128.98, 128.62, 128.49, 127.90, 127.81, 126.83, 125.45. EI-MS: *m/z* [M+H]<sup>+</sup> 284.

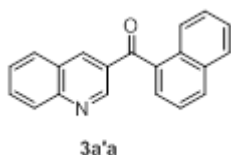

#### Naphthalen-2-yl(quinolin-3-yl)methanone (3b'a)

Yellow solid<sup>3</sup>. <sup>1</sup>H NMR (400 MHz, CDCl<sub>3</sub>) δ 9.43 (d, *J* = 2.2 Hz, 1H), 8.69 – 8.65 (m, 1H), 8.37 (d, *J* = 1.4 Hz, 1H), 8.31 – 8.26 (m, 1H), 8.05 (d, *J* = 1.3 Hz, 2H), 8.00 – 7.96 (m, 3H), 7.94 – 7.90 (m, 1H), 7.72 – 7.68 (m, 2H), 7.66 – 7.61 (m, 1H). <sup>13</sup>C NMR (101 MHz, CDCl<sub>3</sub>) δ 194.81, 150.36, 149.46, 138.81, 135.54, 134.34, 132.31, 132.09, 131.86, 130.48, 129.51, 129.20, 128.77, 127.92, 127.64, 127.10, 126.73, 125.45. EI-MS: *m/z* [M+H]<sup>+</sup> 284.

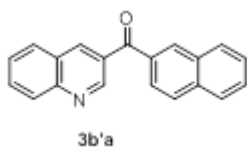

#### Quinolin-3-yl(thiophen-2-yl)methanone (3c'a)

White solid; mp 88-90 °C (lit. value<sup>3</sup> 89-90 °C). <sup>1</sup>H NMR (400 MHz, CDCl<sub>3</sub>) δ 9.40 (d, *J* = 2.2 Hz, 1H), 8.73 (d, *J* = 2.2 Hz, 1H), 8.26 (d, *J* = 8.5 Hz, 1H), 8.04 – 7.99 (m, 1H), 7.95 – 7.90 (m, 1H), 7.86 (dd, *J* = 5.0, 1.1 Hz, 1H), 7.78 (dd, *J* = 3.8, 1.1 Hz, 1H), 7.73 – 7.68 (m, 1H), 7.28 (dd, *J* = 4.9, 3.8 Hz, 1H). <sup>13</sup>C NMR (101 MHz, CDCl<sub>3</sub>) δ 186.14, 149.58, 149.40, 146.13, 143.23, 137.85, 135.09, 131.85, 130.77, 129.46, 129.10, 128.36, 127.74, 126.74. EI-MS: *m/z* [M+H]<sup>+</sup> 240.

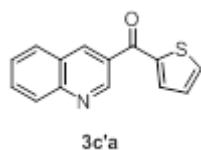

#### Furan-2-yl(quinolin-3-yl)methanone (3d'a)

White solid; mp 100-101 °C (lit. value<sup>3</sup> 98-100 °C). <sup>1</sup>H NMR (500 MHz, CDCl<sub>3</sub>) δ 9.47 (d, *J* = 2.3 Hz, 1H), 8.85 (d, *J* = 2.2 Hz, 1H), 8.22 – 8.17 (m, 1H), 7.98 (dd, *J* = 8.2, 1.4 Hz, 1H), 7.88 – 7.84 (m, 1H), 7.80 – 7.76 (m, 1H), 7.67 – 7.63 (m, 1H), 7.40 (dd, *J* = 3.6, 0.8 Hz, 1H), 6.68 (dd, *J* = 3.5, 1.7 Hz, 1H). <sup>13</sup>C NMR (126 MHz, CDCl<sub>3</sub>) δ 180.36, 152.43, 149.78, 149.51, 147.48, 138.37, 131.92, 129.68, 129.46, 129.27, 127.59, 126.78, 120.77, 112.69. EI-MS: *m/z* [M+H]<sup>+</sup> 224.

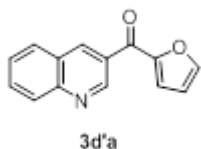

#### (6-Fluoroquinolin-3-yl)(phenyl)methanone (3ab)

Yellow oil. <sup>1</sup>H NMR (400 MHz, CDCl<sub>3</sub>) δ 9.31 (d, *J* = 2.1 Hz, 1H), 8.55 (d, *J* = 2.1 Hz, 1H), 8.25 (dd, *J* = 9.2, 5.2 Hz, 1H), 7.93 – 7.88 (m, 2H), 7.74 – 7.63 (m, 2H), 7.63 – 7.55 (m, 3H). <sup>13</sup>C NMR (101 MHz, CDCl<sub>3</sub>) δ 194.62, 160.97 (d, *J*<sub>C-F</sub> = 249 Hz), 149.57, 146.46, 138.07, 136.82, 133.31, 131.99 (d, *J*<sub>C-F</sub> = 9 Hz), 130.80, 130.08, 128.75, 127.45 (d, *J*<sub>C-F</sub> = 10 Hz), 122.11 (d, *J*<sub>C-F</sub> = 26 Hz), 112.17 (d, *J*<sub>C-F</sub> = 22 Hz). HRMS (ESI): calcd. for C<sub>16</sub>H<sub>11</sub>FNO [M + H]<sup>+</sup> 252.0819; found 252.0802.

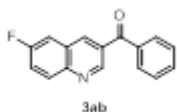

#### (7-Chloroquinolin-3-yl)(phenyl)methanone (3ac)



Yellow solid, mp 84-85 °C.  $^1\text{H}$  NMR (400 MHz,  $\text{CDCl}_3$ )  $\delta$  9.37 (d,  $J = 2.1$  Hz, 1H), 8.61 (d,  $J = 2.1$  Hz, 1H), 8.27 (d,  $J = 2.0$  Hz, 1H), 7.93 – 7.89 (m, 3H), 7.75 – 7.70 (m, 1H), 7.66 (dd,  $J = 8.7, 2.1$  Hz, 1H), 7.60 (t,  $J = 7.7$  Hz, 2H).  $^{13}\text{C}$  NMR (101 MHz,  $\text{CDCl}_3$ )  $\delta$  194.30, 151.78, 151.10, 149.26, 138.91, 138.32, 136.77, 133.33, 130.34, 130.04, 129.03, 128.79, 128.31, 125.15. HRMS (ESI): calcd. for  $\text{C}_{16}\text{H}_{11}\text{ClNO}$   $[\text{M} + \text{H}]^+$  268.0524; found 268.0534.

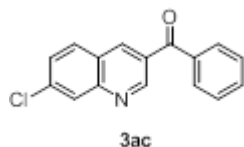

#### (7-Bromoquinolin-3-yl)(phenyl)methanone (3ad)

Yellow solid; mp 101-102 °C;  $^1\text{H}$  NMR (400 MHz,  $\text{CDCl}_3$ )  $\delta$  9.36 (d,  $J = 2.1$  Hz, 1H), 8.61 (d,  $J = 2.1$  Hz, 1H), 8.47 (d,  $J = 1.9$  Hz, 1H), 7.92 – 7.88 (m, 2H), 7.86 (d,  $J = 8.6$  Hz, 1H), 7.80 (dd,  $J = 8.7, 1.8$  Hz, 1H), 7.72 (td,  $J = 7.3, 1.4$  Hz, 1H), 7.62 – 7.58 (m, 2H).  $^{13}\text{C}$  NMR (101 MHz,  $\text{CDCl}_3$ )  $\delta$  194.24, 150.93, 139.07, 136.75, 133.34, 131.60, 130.45, 130.28, 130.03, 129.08, 129.00, 128.80, 126.80, 125.42. HRMS (ESI): calcd. for  $\text{C}_{16}\text{H}_{11}\text{BrNO}$   $[\text{M} + \text{H}]^+$  312.0019; found 312.0023.

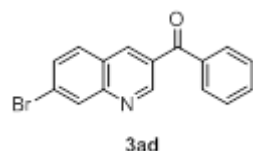

#### (6,7-Dimethoxyquinolin-3-yl)(phenyl)methanone (3ae)

White solid; mp 142-143 °C (lit. value<sup>3</sup> 143-145 °C).  $^1\text{H}$  NMR (400 MHz,  $\text{CDCl}_3$ )  $\delta$  9.19 (d,  $J = 4.3$  Hz, 1H), 8.50 (dt,  $J = 4.0, 2.1$  Hz, 1H), 7.92 – 7.88 (m, 2H), 7.74 – 7.67 (m, 1H), 7.62 – 7.54 (m, 3H), 7.19 (dd,  $J = 4.3, 2.0$  Hz, 1H), 4.14 (s, 3H), 4.08 (s, 3H).  $^{13}\text{C}$  NMR (101 MHz,  $\text{CDCl}_3$ )  $\delta$  195.01, 154.62, 150.65, 148.38, 146.93, 137.44, 137.03, 132.79, 129.97, 128.58, 122.46, 107.80, 106.10, 56.40, 56.20. EI-MS:  $m/z$   $[\text{M} + \text{H}]^+$  294.

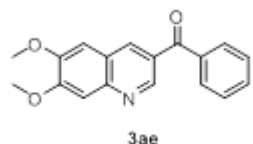

#### Phenyl(quinolin-3-yl-2-d)methanone (3aa')

White solid, mp 33-34 °C.  $^1\text{H}$  NMR (400 MHz,  $\text{CDCl}_3$ )  $\delta$  8.60 (d,  $J = 2.4$  Hz, 1H), 8.24 (d,  $J = 8.5$  Hz, 1H), 7.96 (dd,  $J = 8.2, 1.4$  Hz, 1H), 7.93 – 7.89 (m, 3H), 7.73 – 7.65 (m, 2H), 7.60 – 7.56 (m, 2H).  $^{13}\text{C}$  NMR (101 MHz,  $\text{CDCl}_3$ )  $\delta$  194.87, 150.32, 149.42, 138.92, 137.06, 133.12, 131.92, 130.07, 129.47, 129.20, 128.69, 127.66, 126.68. HRMS (ESI): calcd. for  $\text{C}_{16}\text{H}_{11}\text{DNO}$   $[\text{M} + \text{H}]^+$  235.0976; found 235.0962.

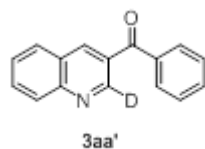

#### (E)-(2-bromophenyl)(quinolin-3-yl)methanone O-methyl oxime (4)

White solid.  $^1\text{H}$  NMR (400 MHz,  $\text{CDCl}_3$ )  $\delta$  9.39 (s, 1H), 8.17 (d,  $J = 8.5$  Hz, 1H), 7.89 (s, 1H), 7.80 – 7.73 (m, 3H), 7.60 – 7.49 (m, 2H), 7.41 (td,  $J = 7.8, 1.8$  Hz, 1H), 7.29 (dd,  $J = 7.6, 1.7$  Hz, 1H), 4.11 (s, 3H).  $^{13}\text{C}$  NMR (101 MHz,  $\text{CDCl}_3$ )  $\delta$  153.36, 148.54, 147.94, 134.56, 134.28, 133.60, 133.10, 131.98, 130.51, 130.19, 129.94, 129.29, 128.39, 127.63, 127.14, 121.83, 63.14. HRMS (ESI): calcd.

for  $C_{17}H_{14}BrN_2O$   $[M + H]^+$  241.0284; found 241.0294.

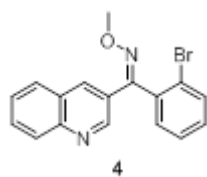

1. S. Khong and O. Kwon, *J. Org. Chem.*, 2012, **77**, 8257-8267.
2. S. B. Wakade, D. K. Tiwari, P. Ganesh, M. Phanindrudu, P. R. Likhari and D. K. Tiwari, *Org. Lett.*, 2017, **19**, 4948-4951.
3. D. K. Tiwari, M. Phanindrudu, S. B. Wakade, J. B. Nanubolu and D. K. Tiwari, *Chem. Commun.*, 2017, **53**, 5302-5305.

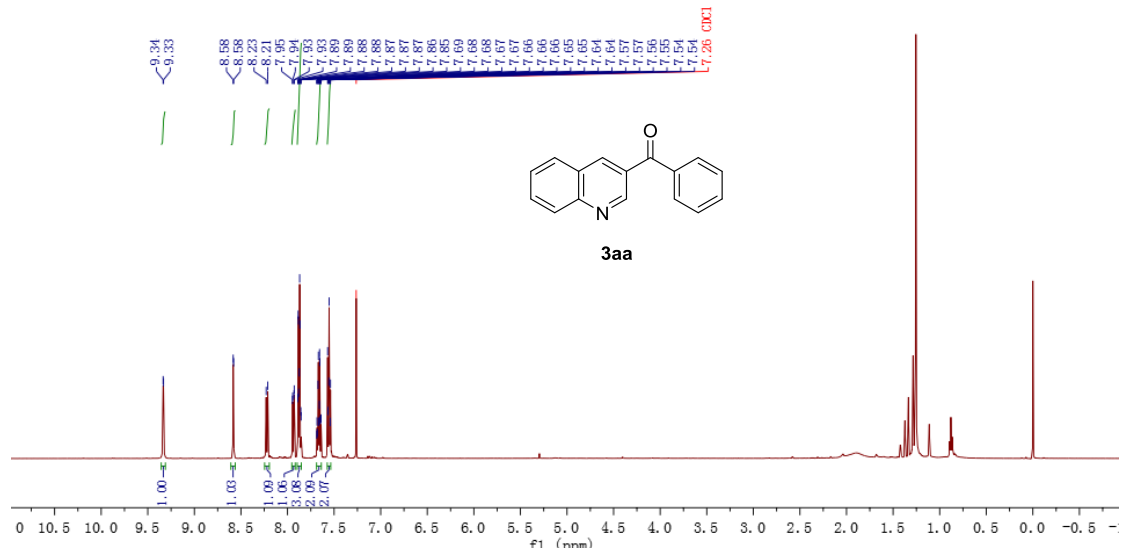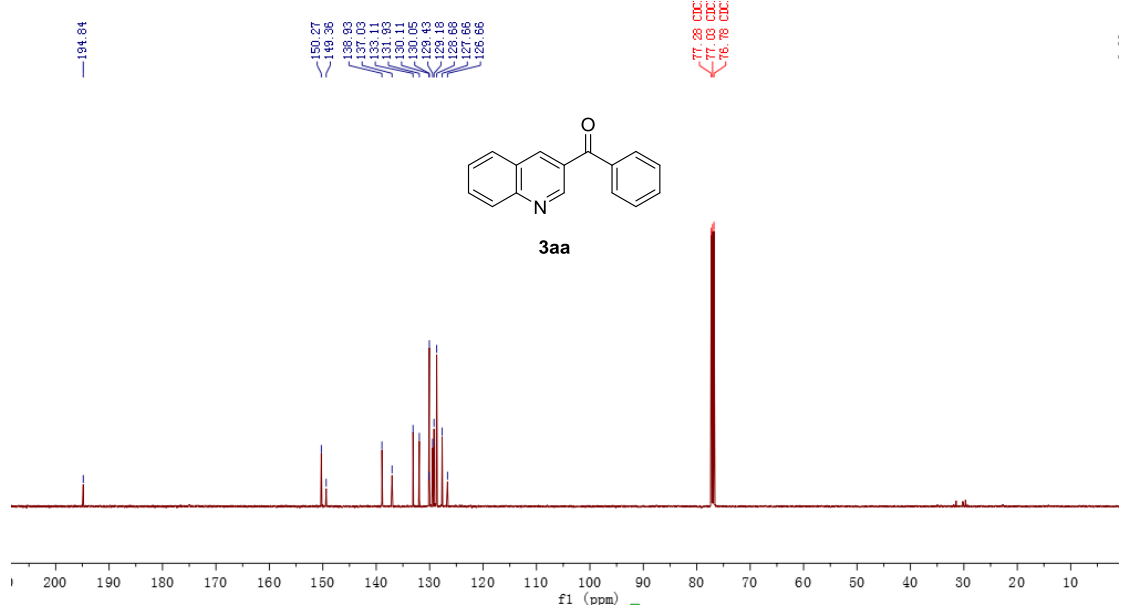

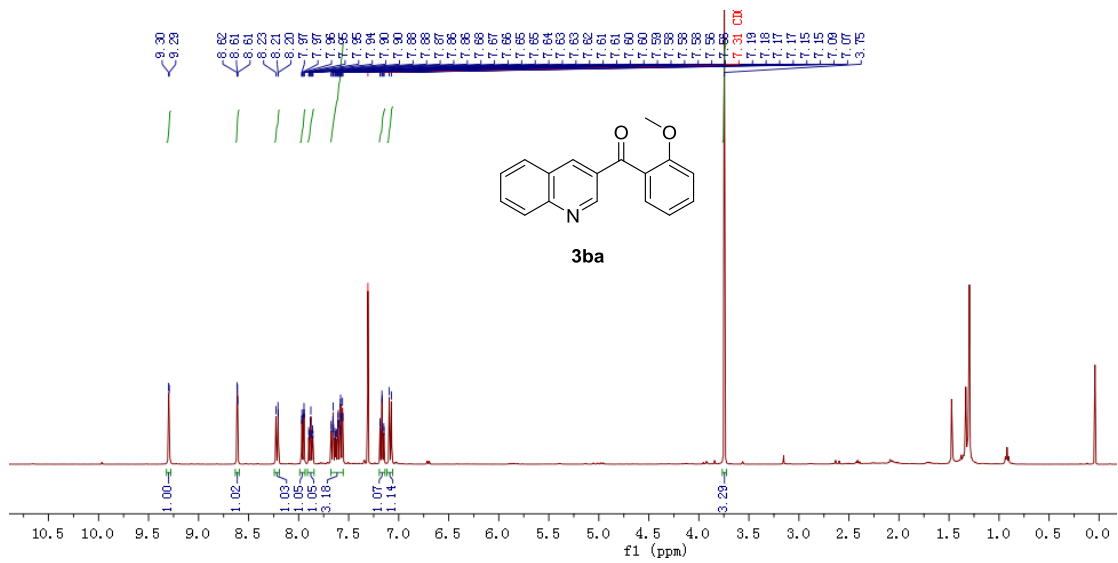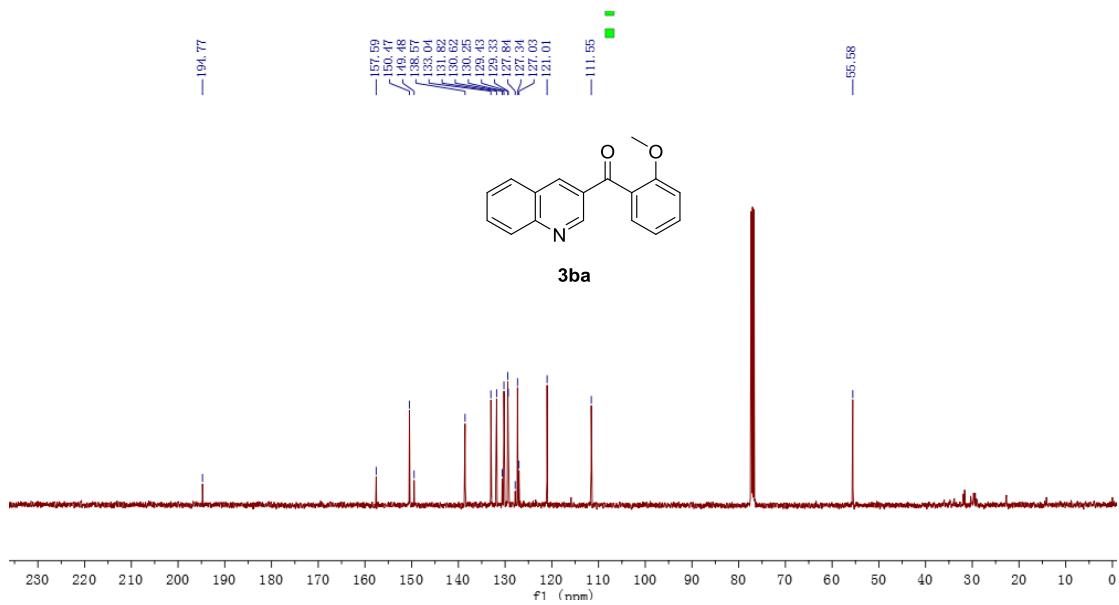

id

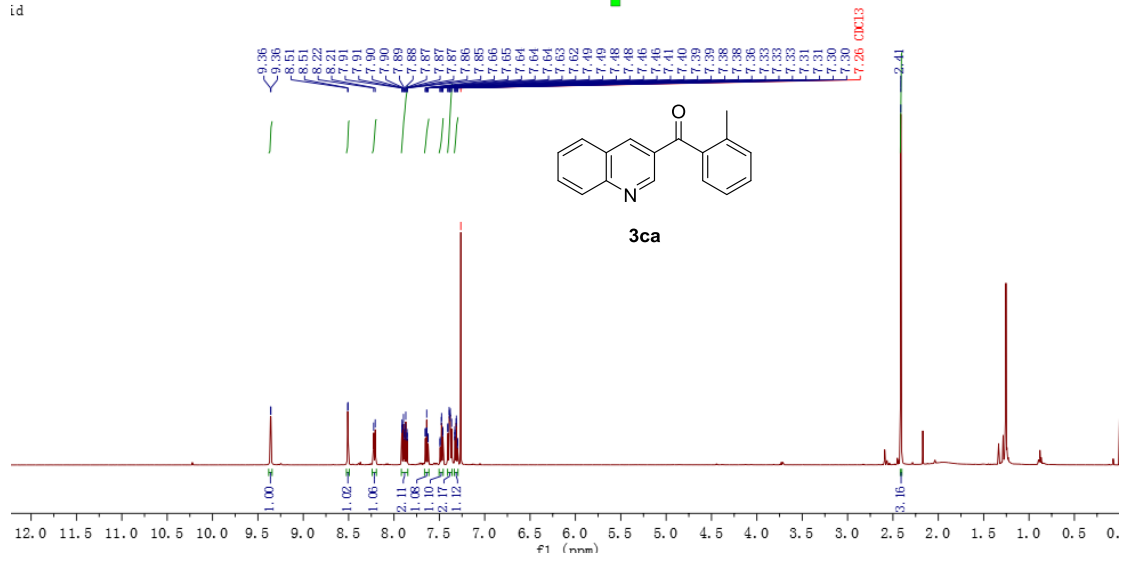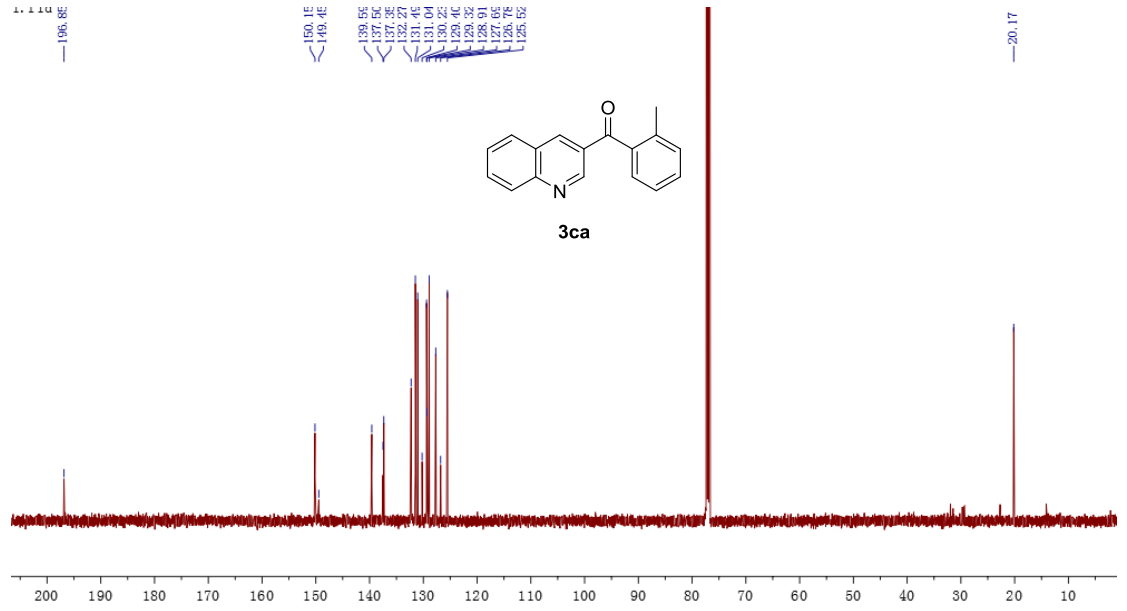

:-14/1

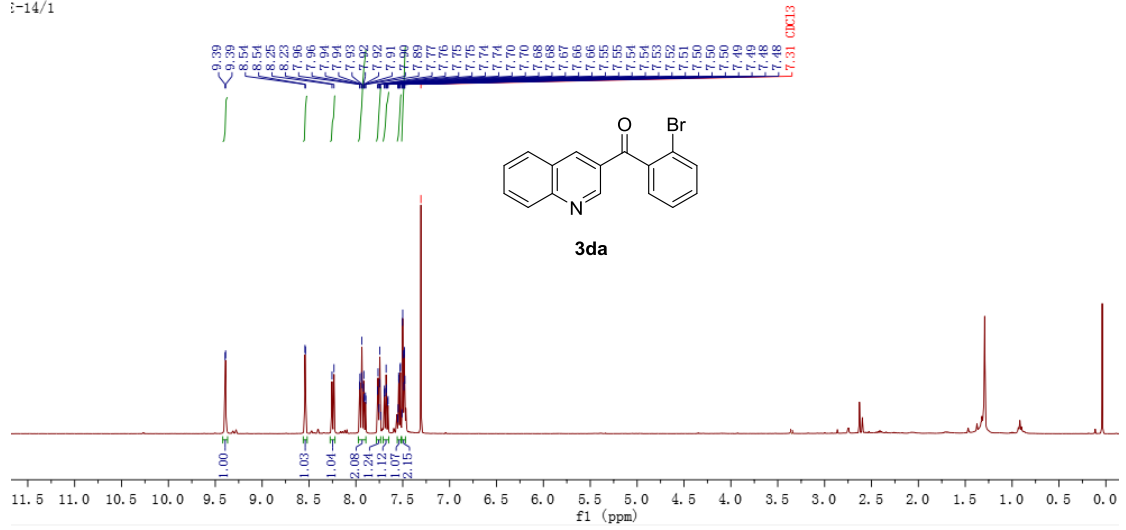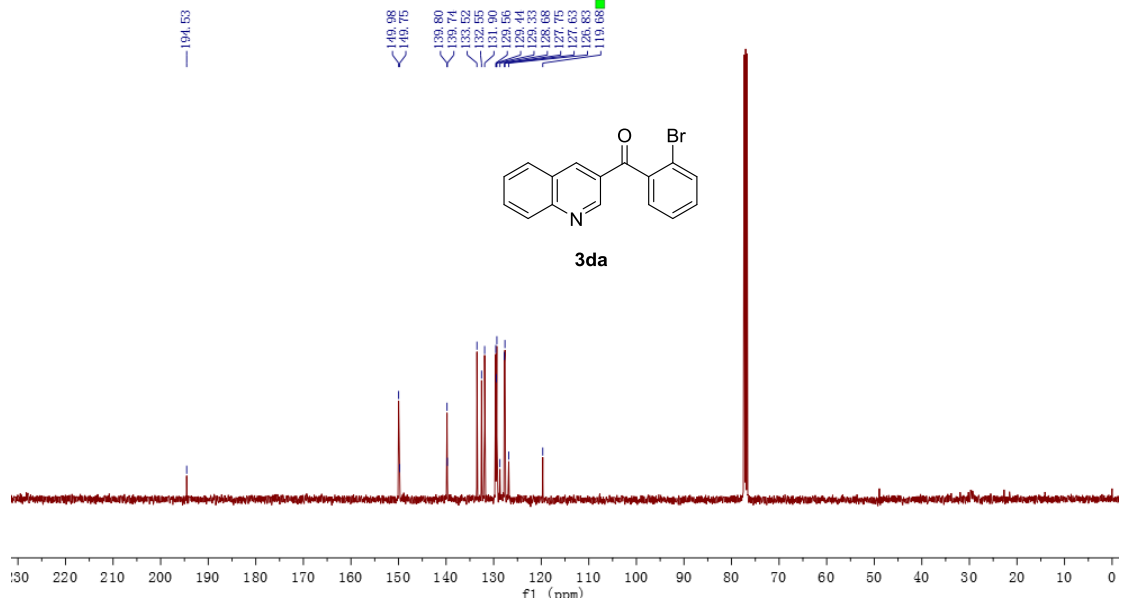

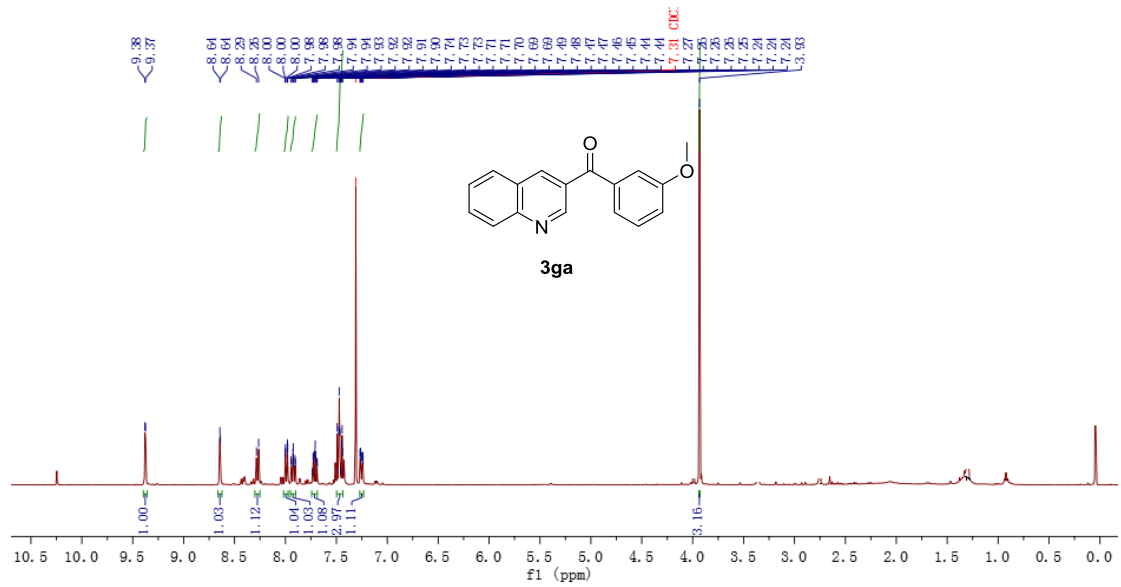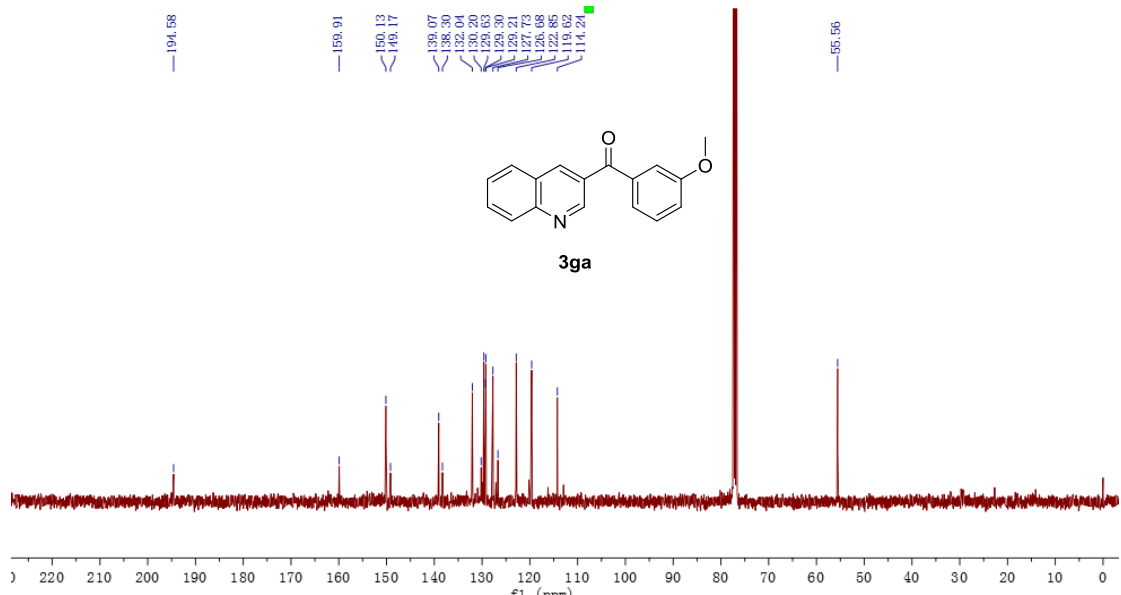

1E-10/1

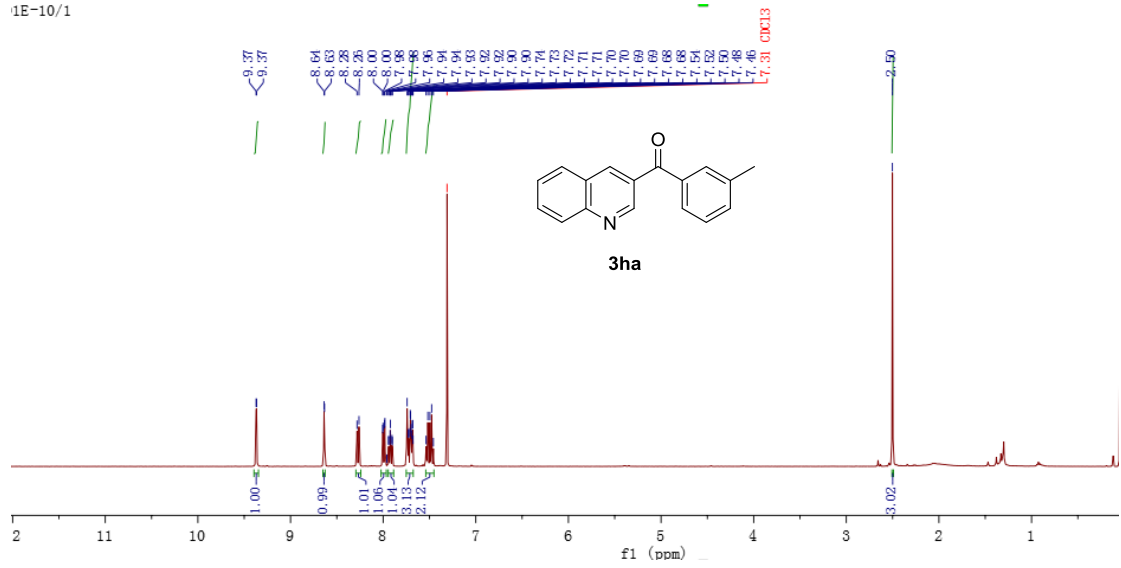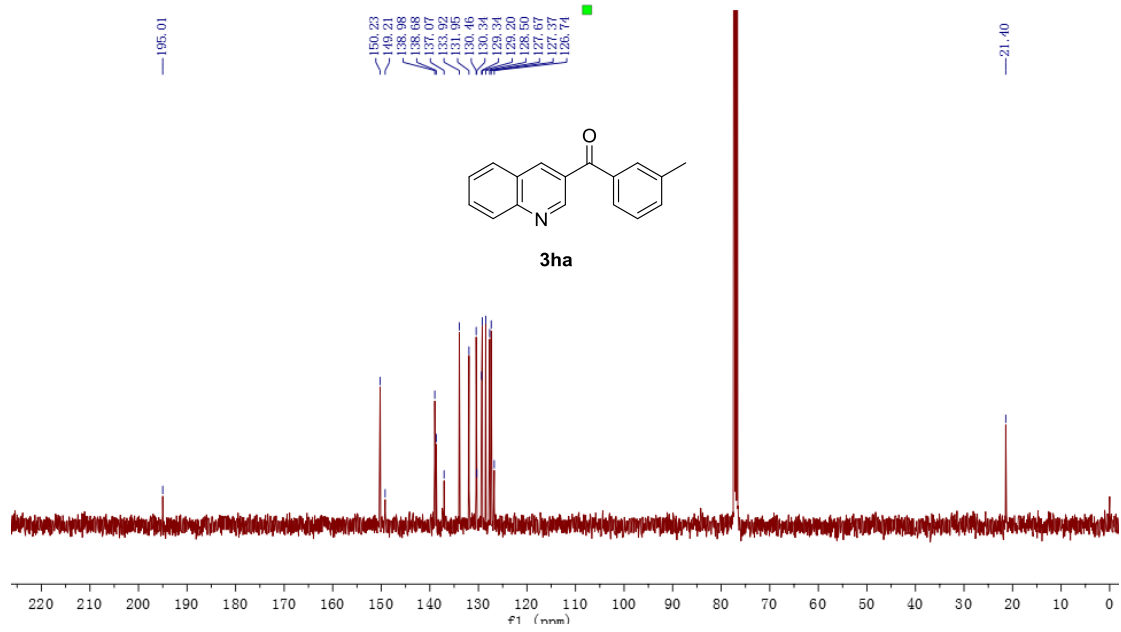



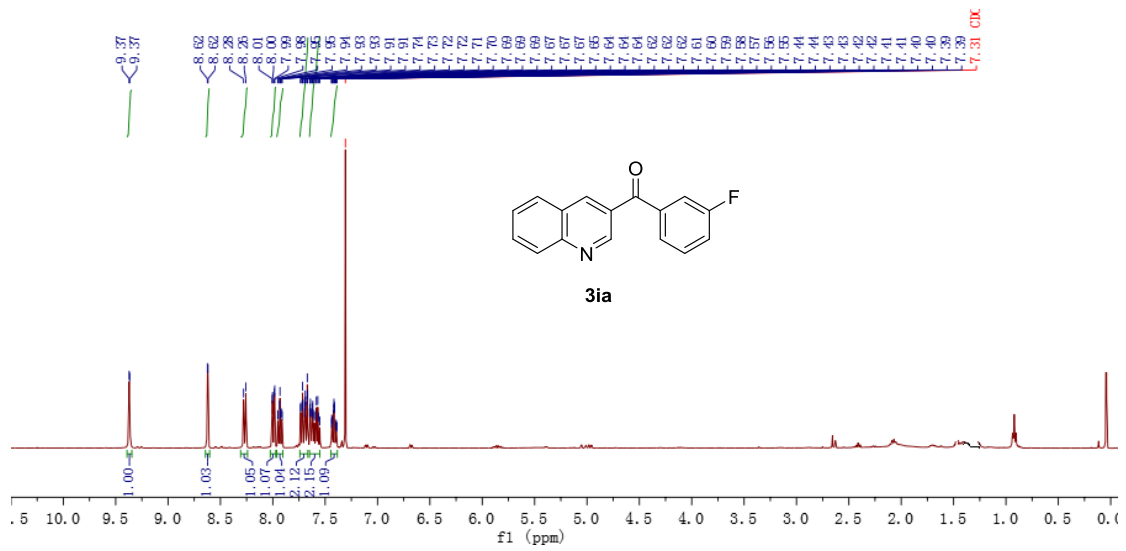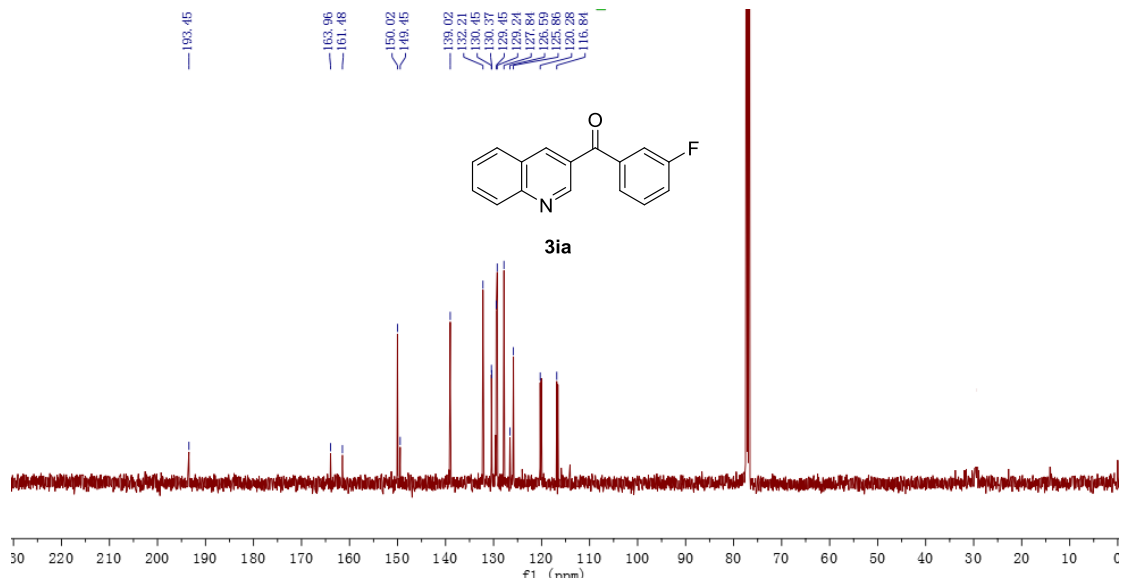

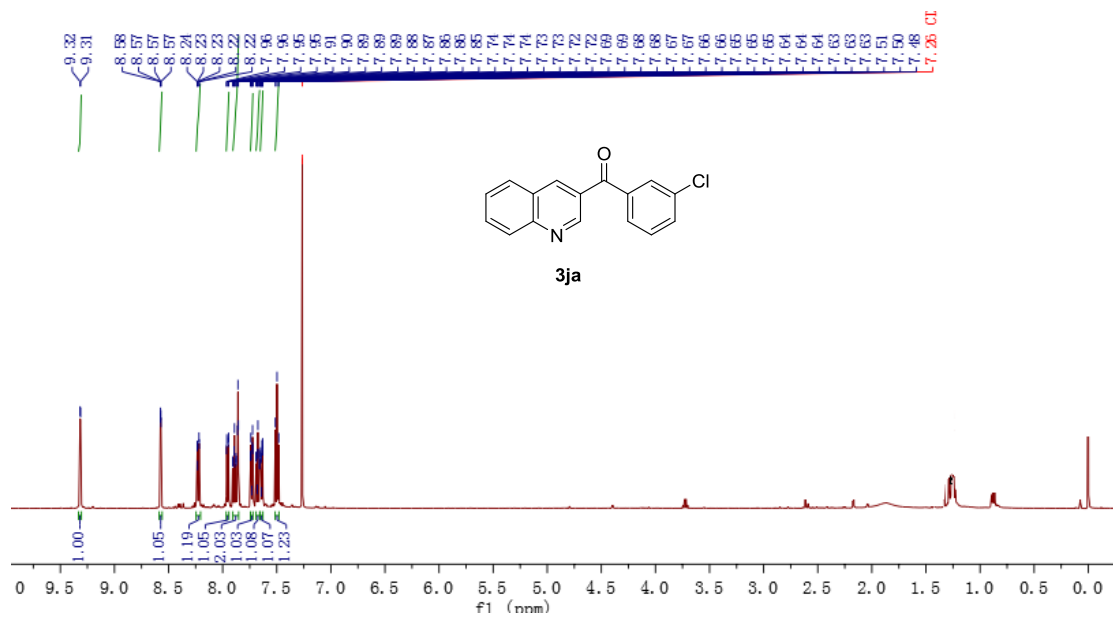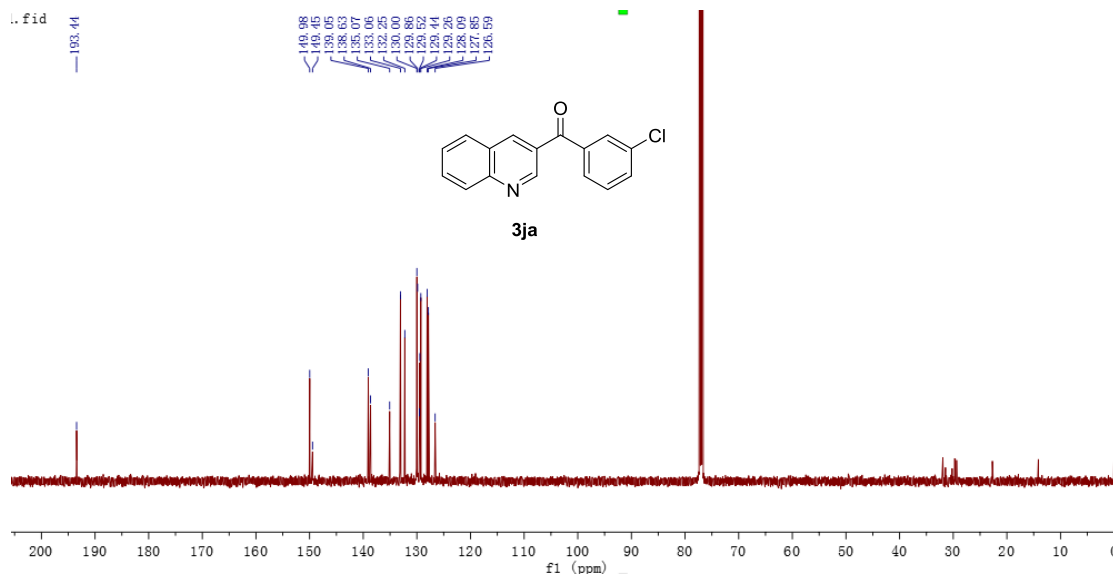

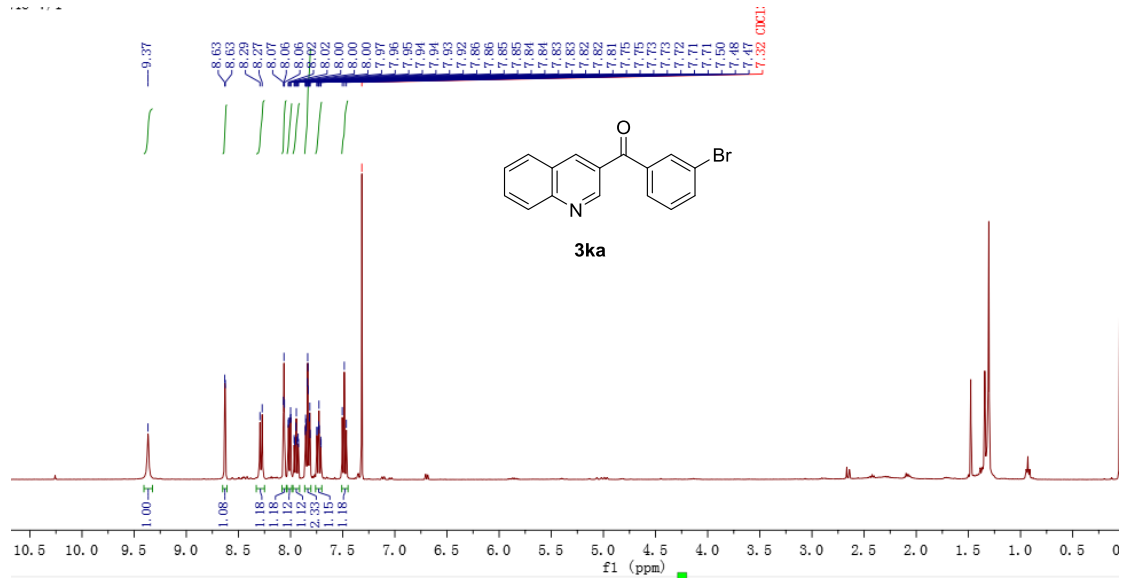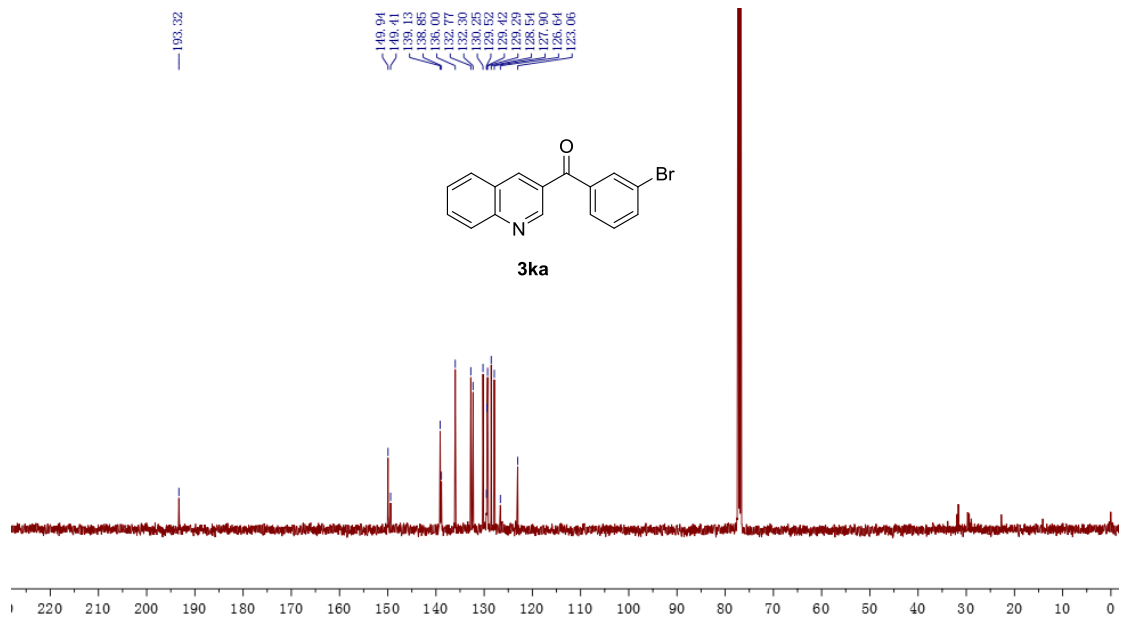

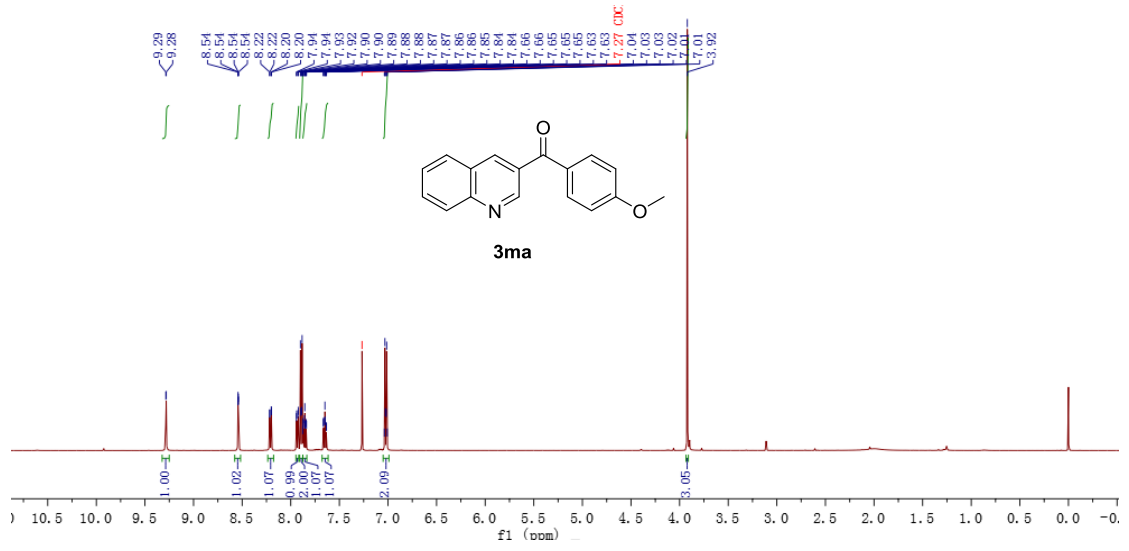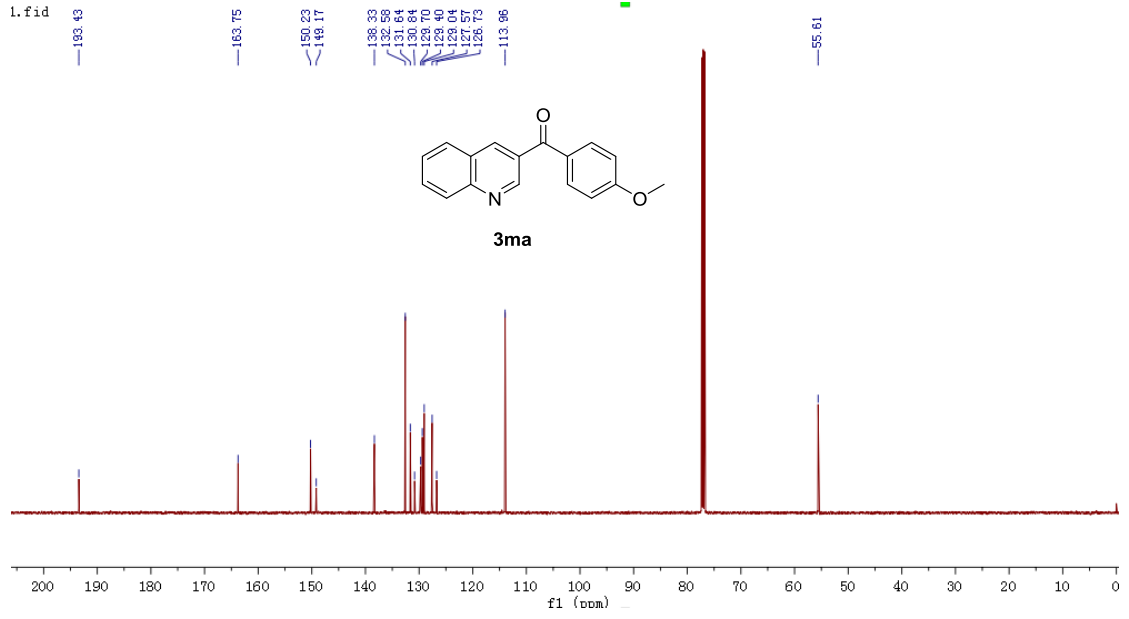

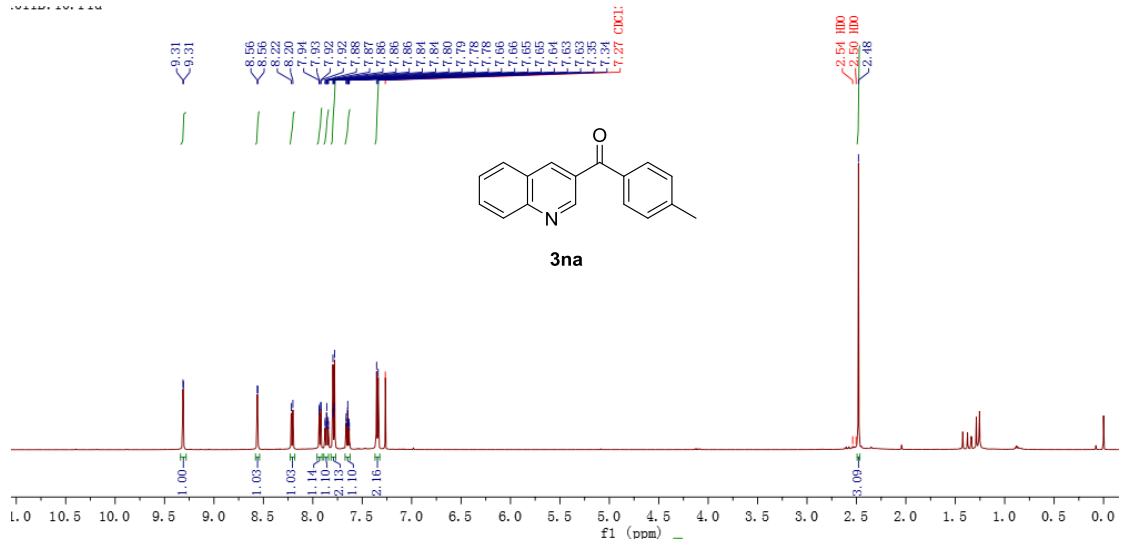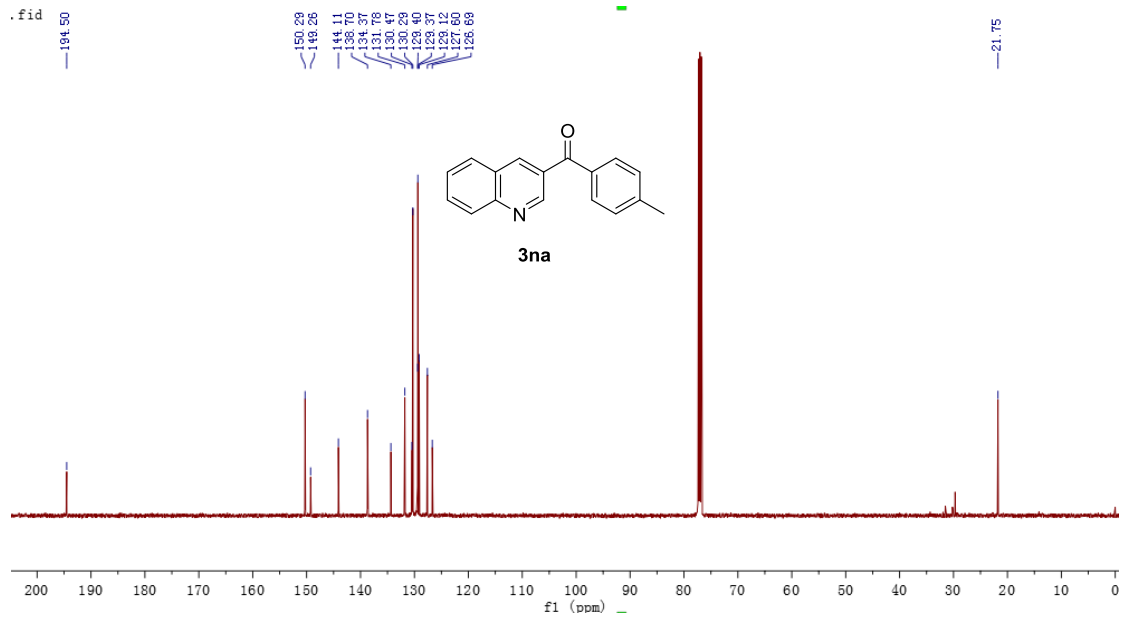

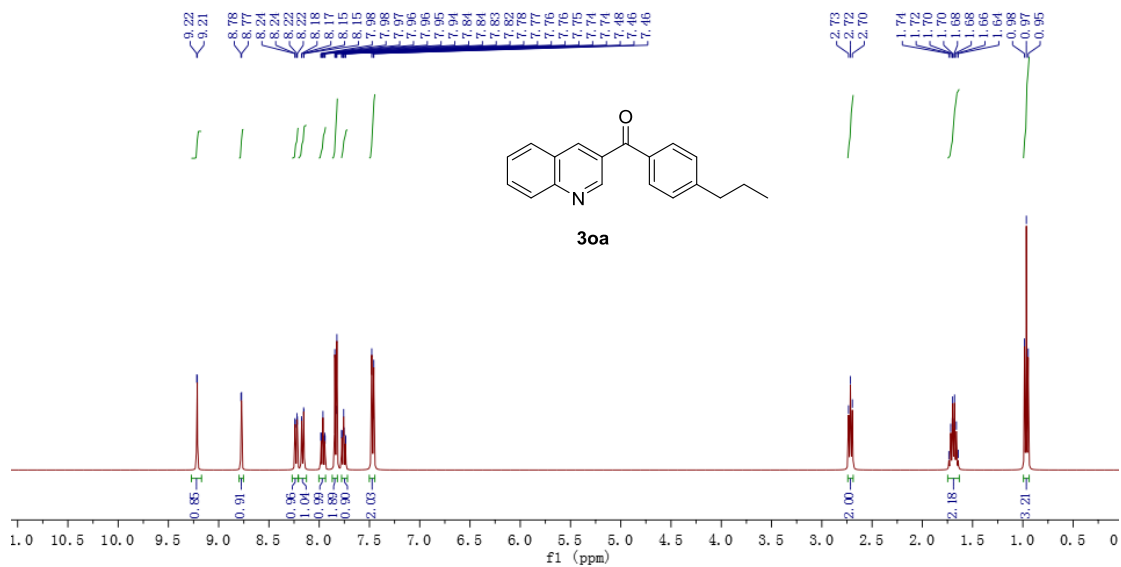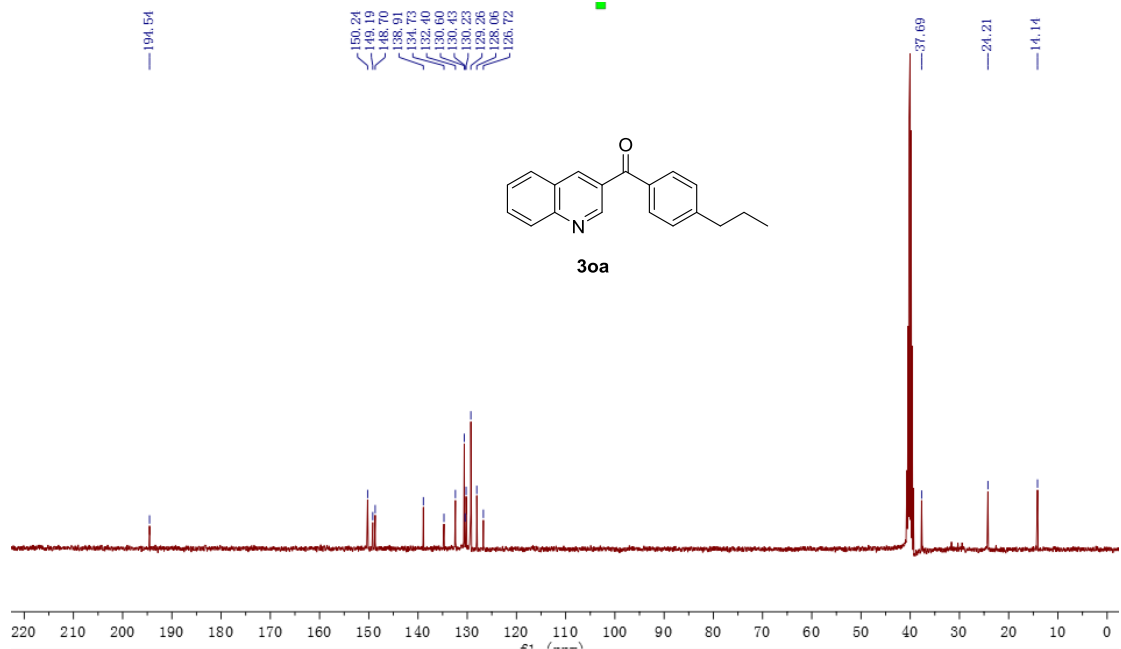

3E-6/1

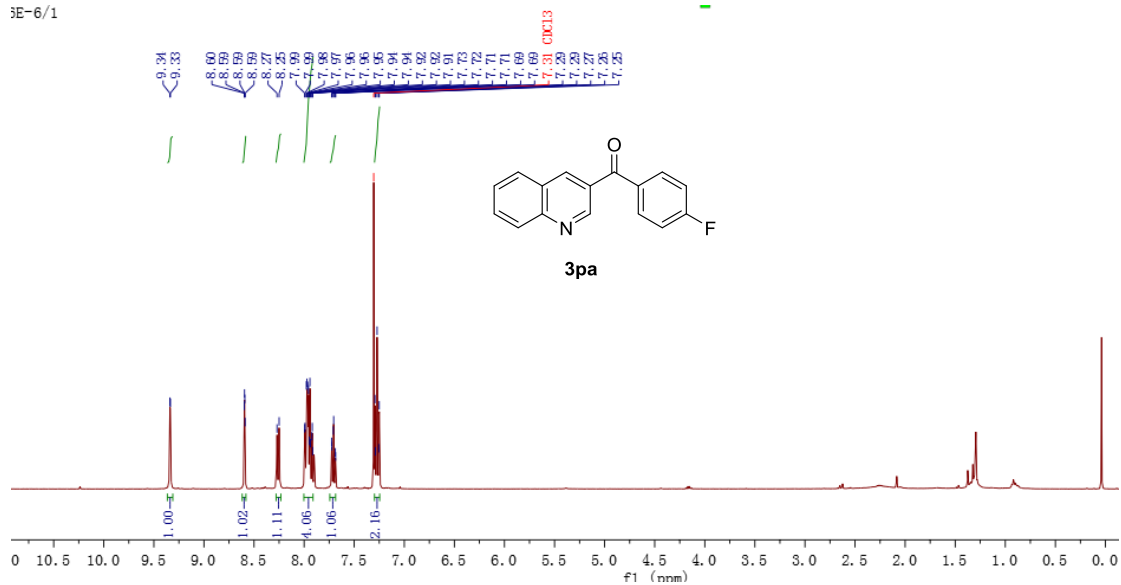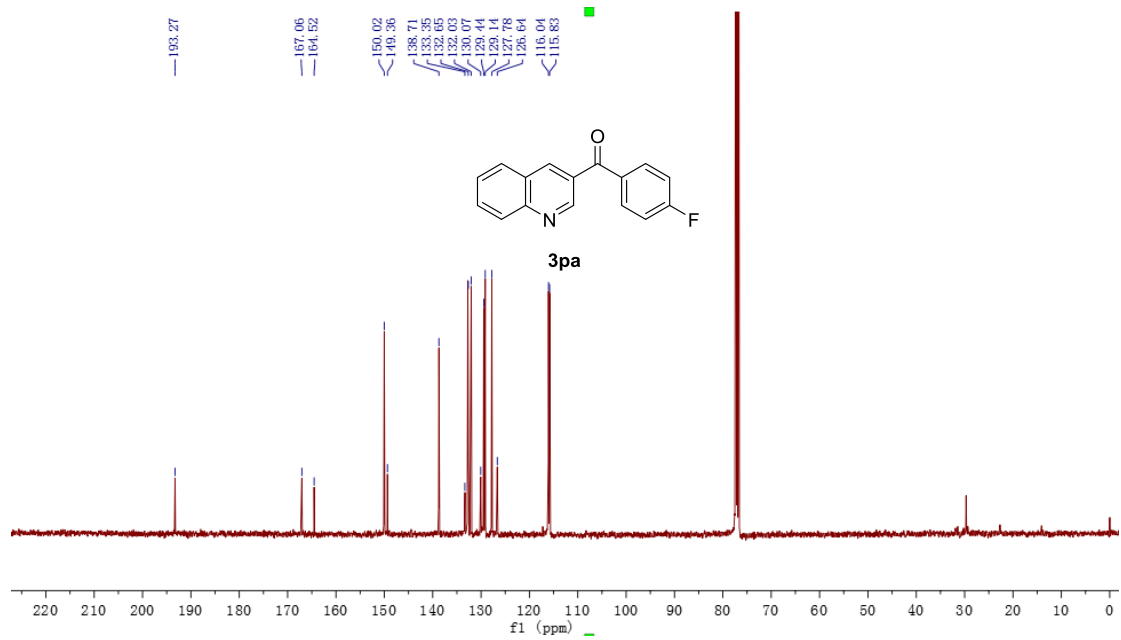

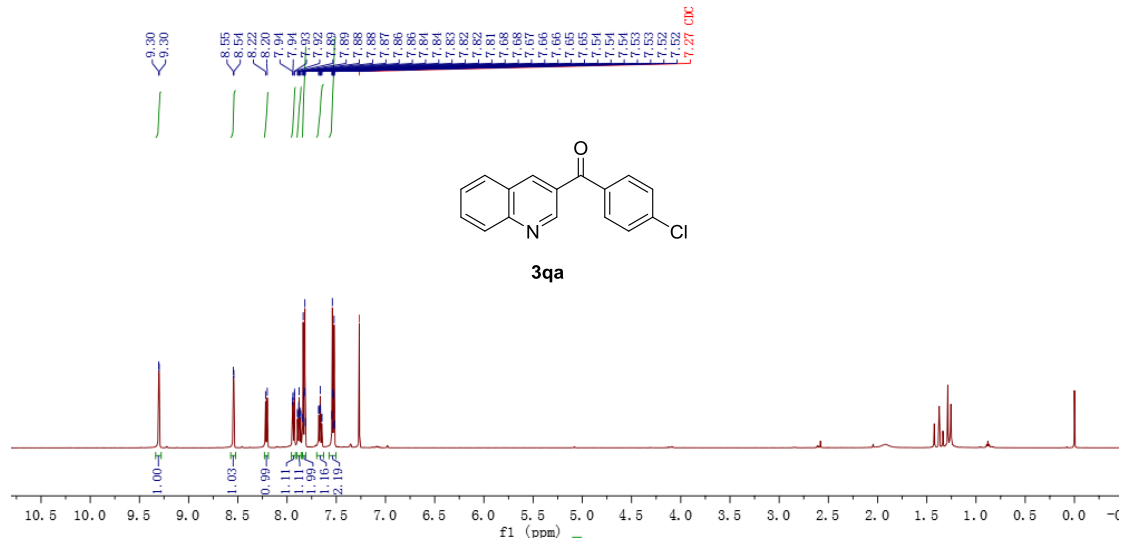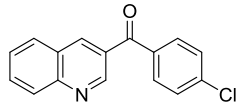

3qa

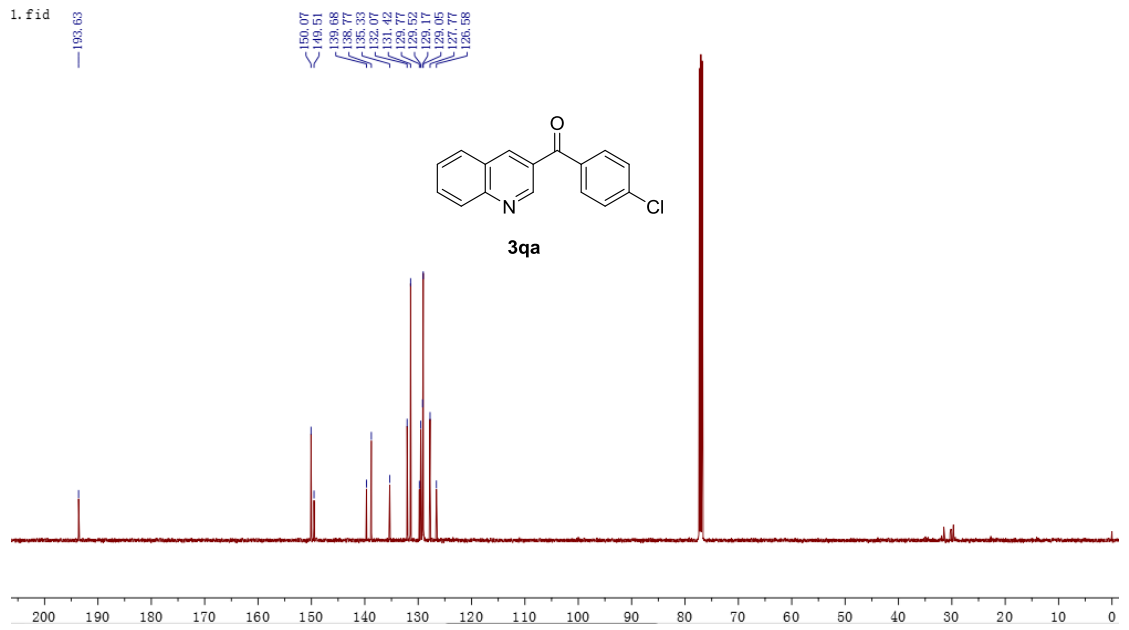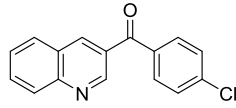

3qa



J. 11a

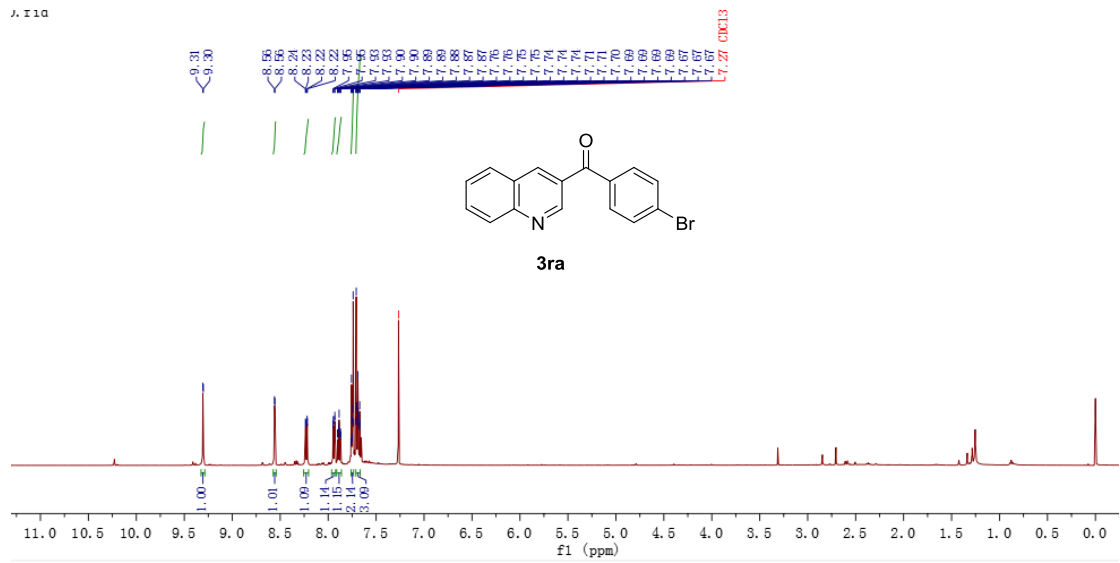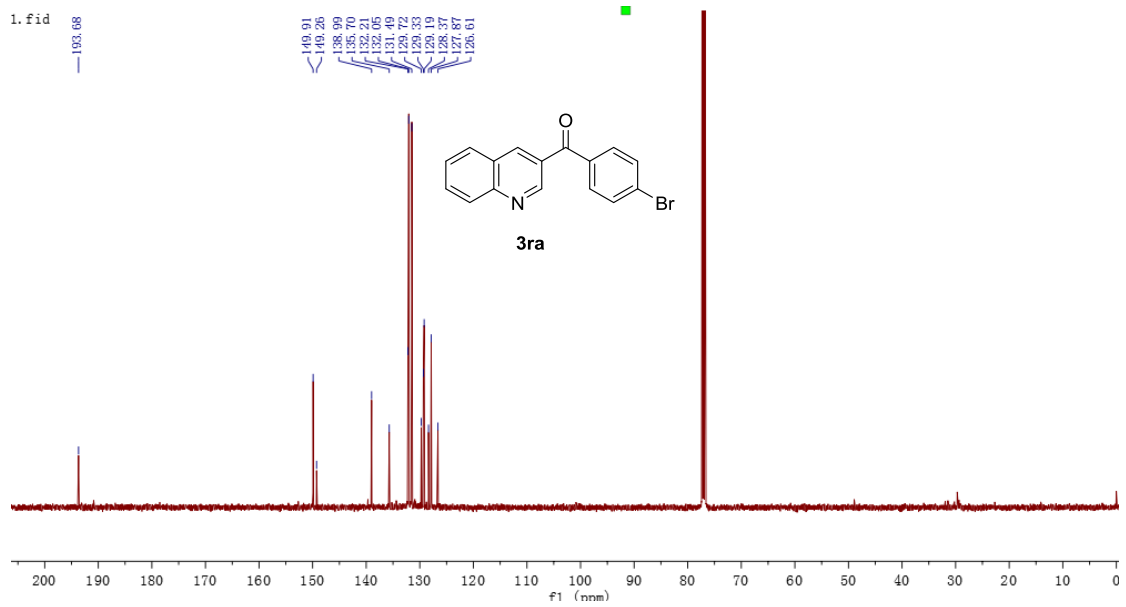

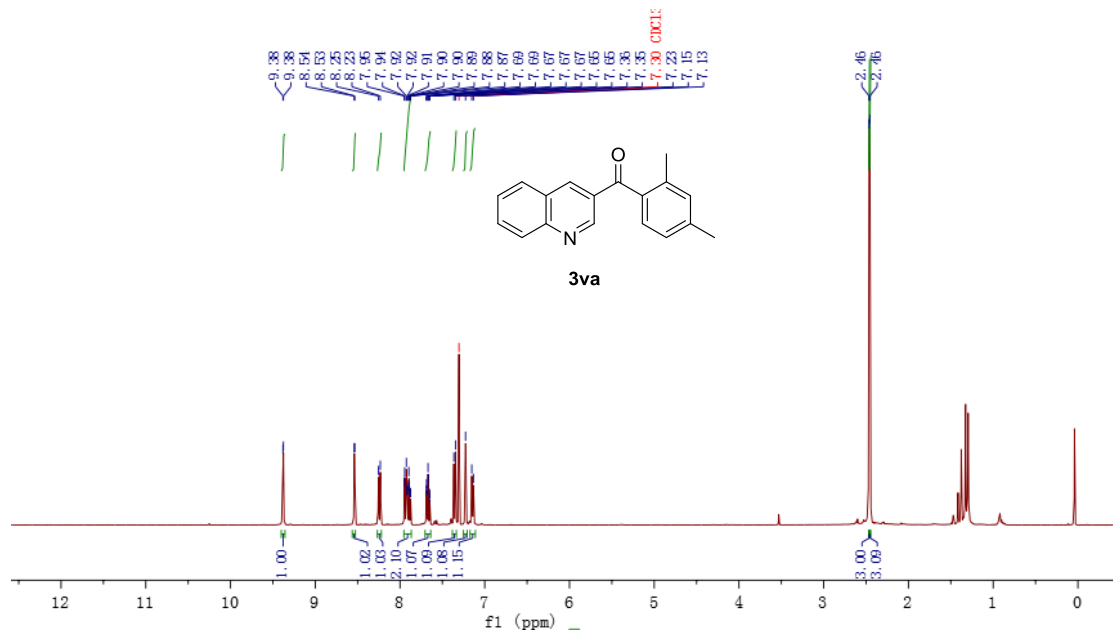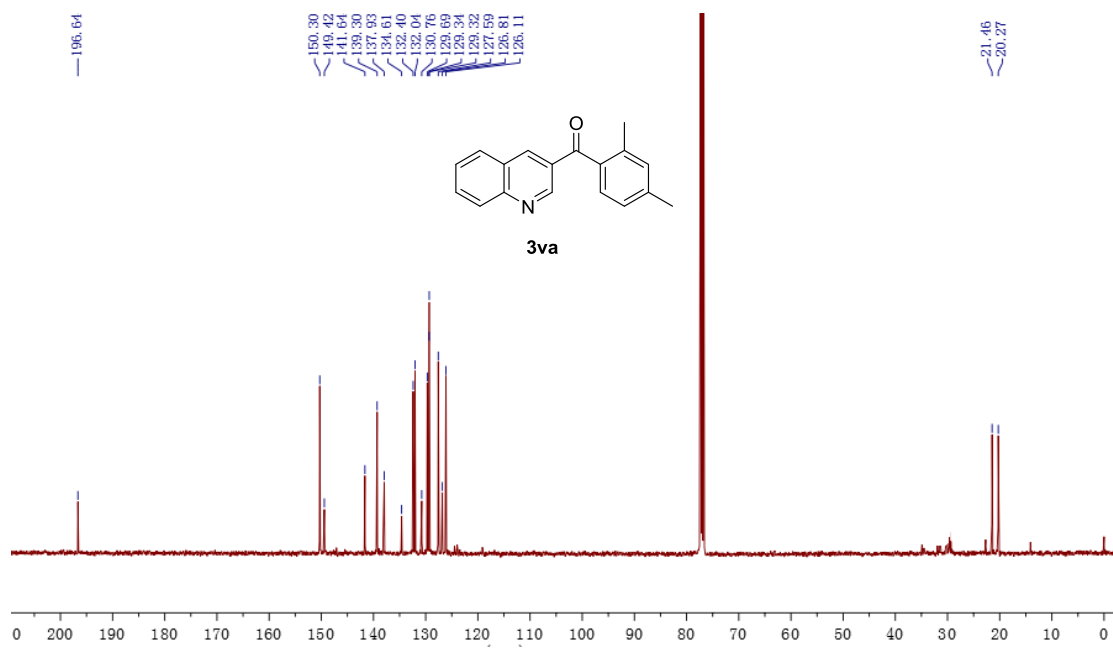

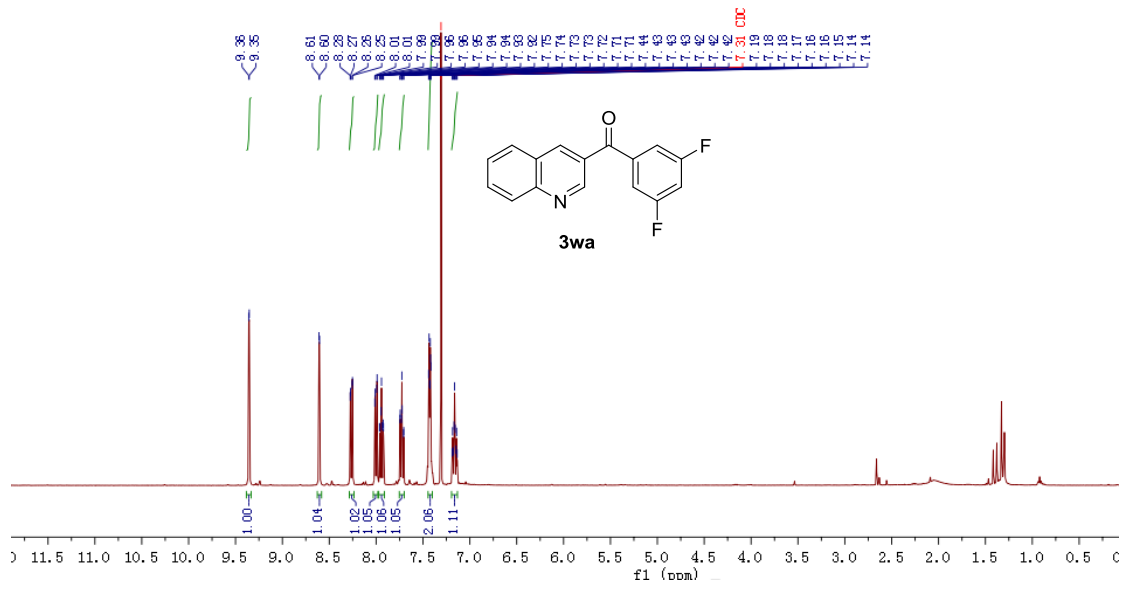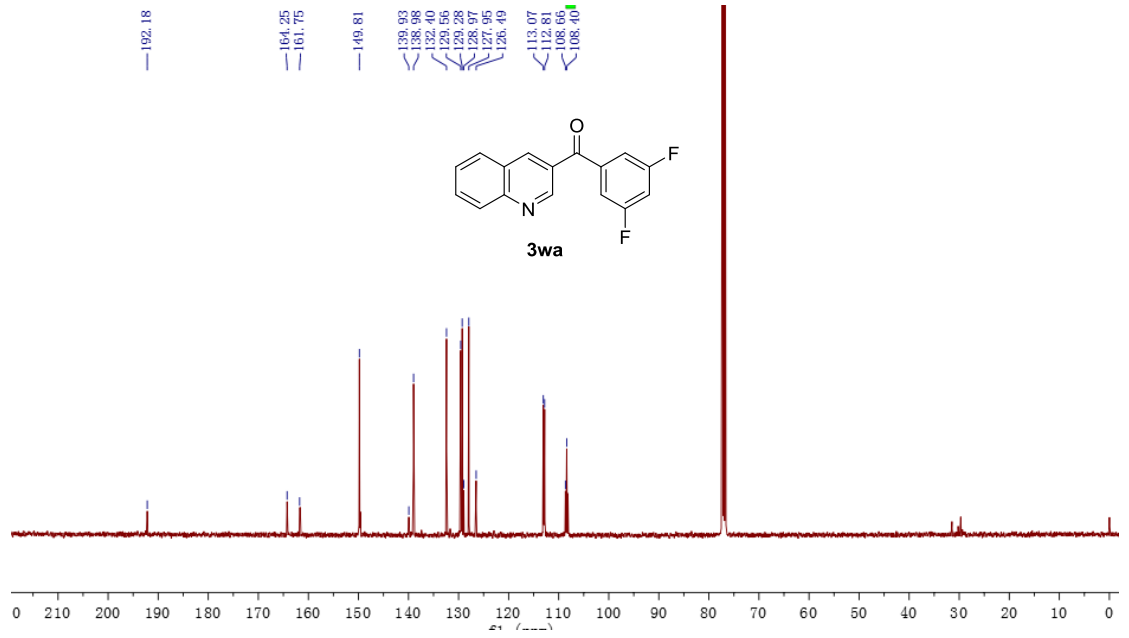

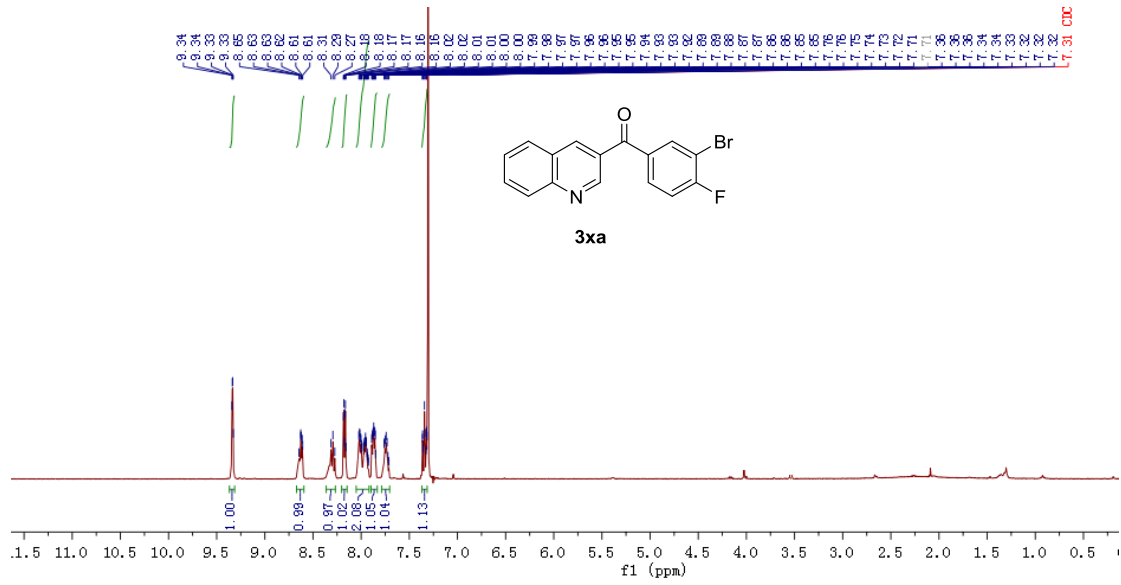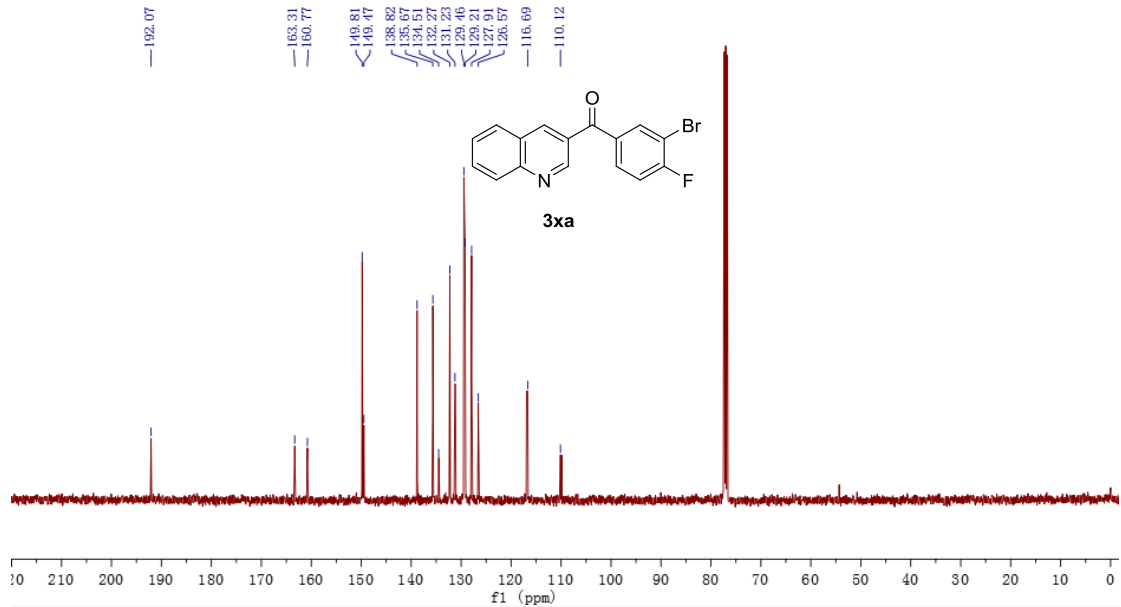

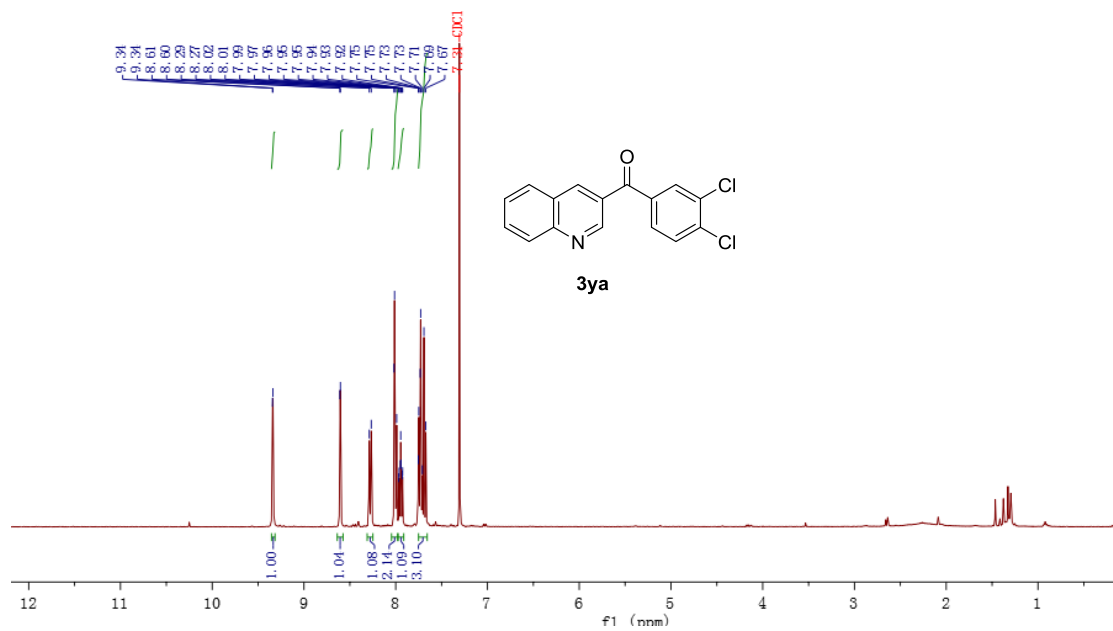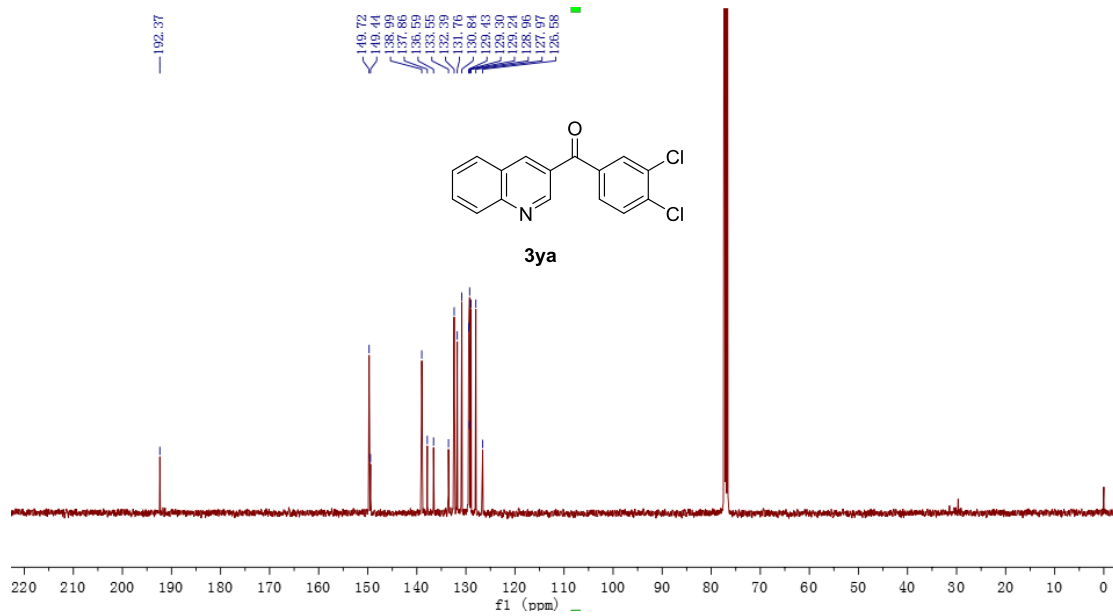

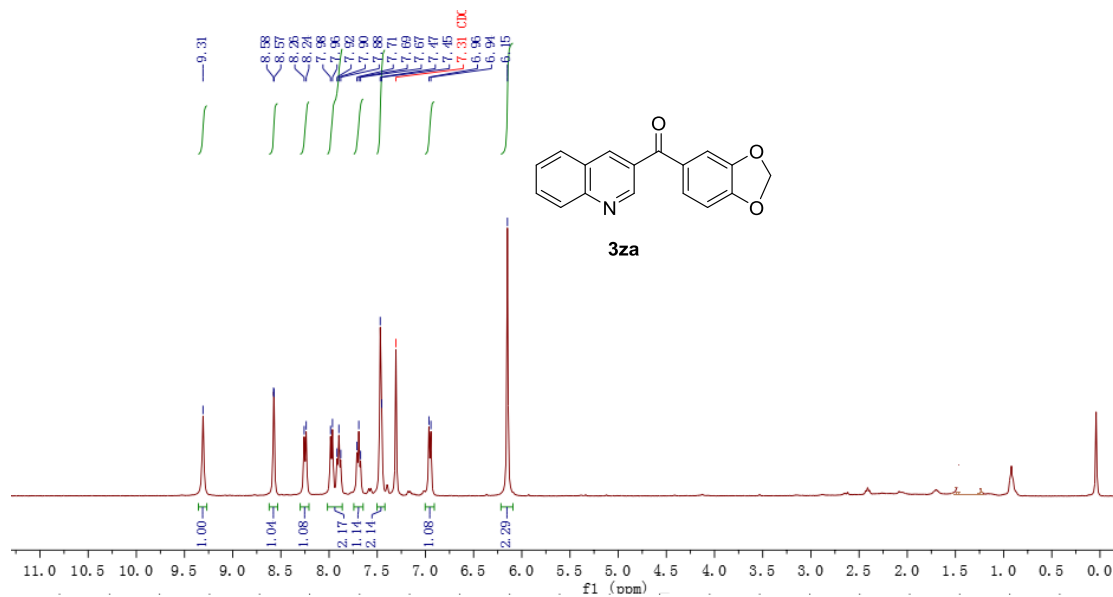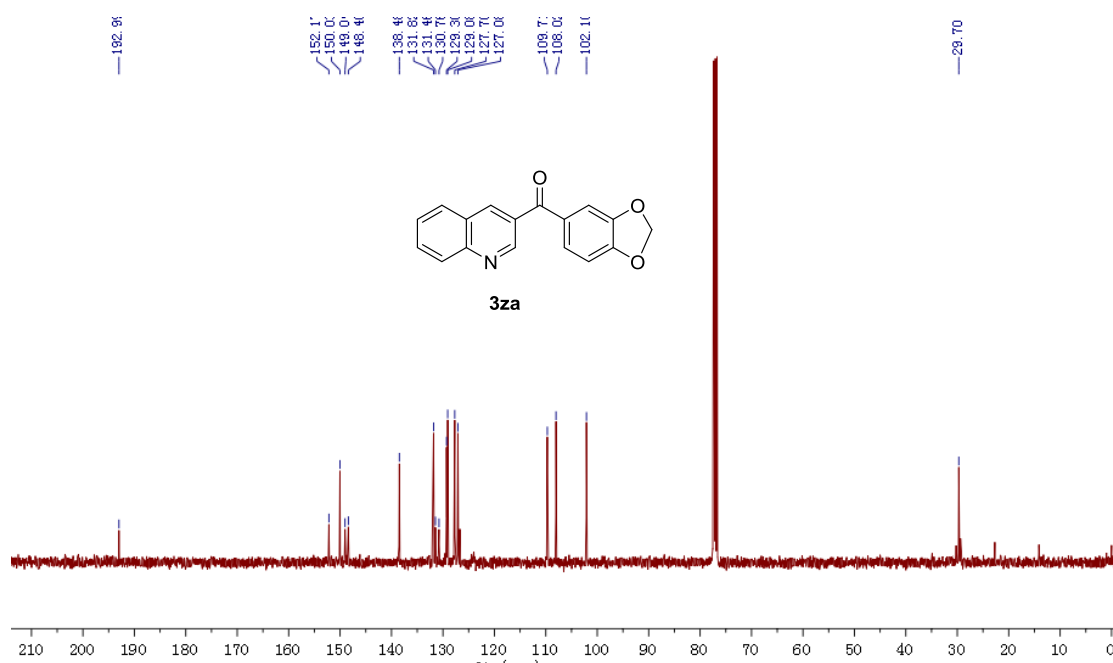

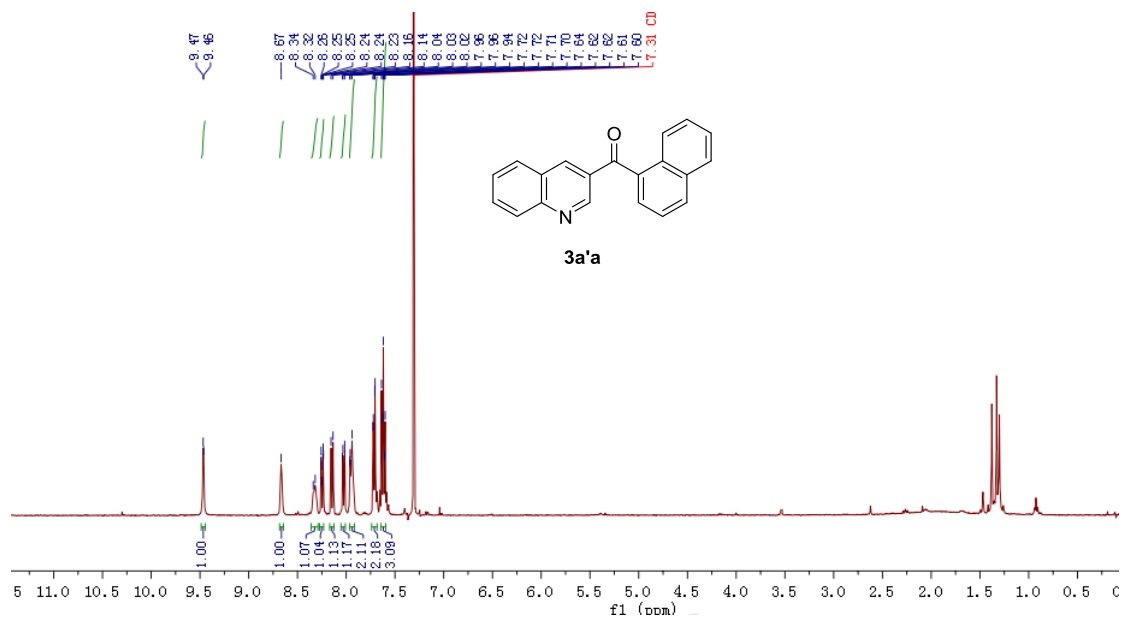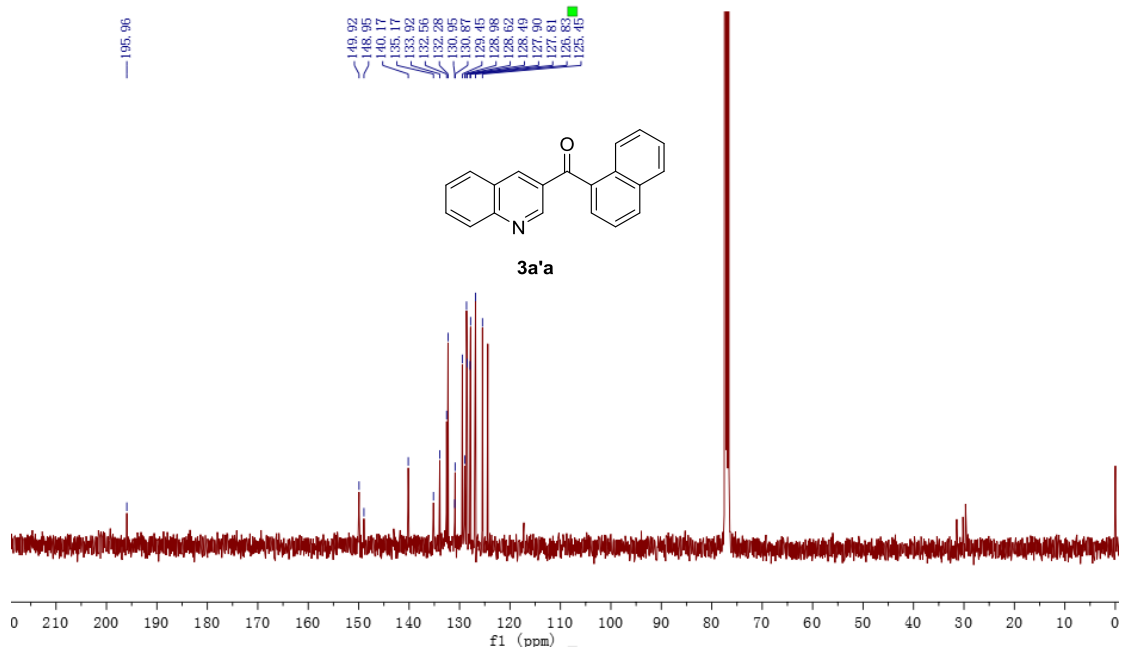

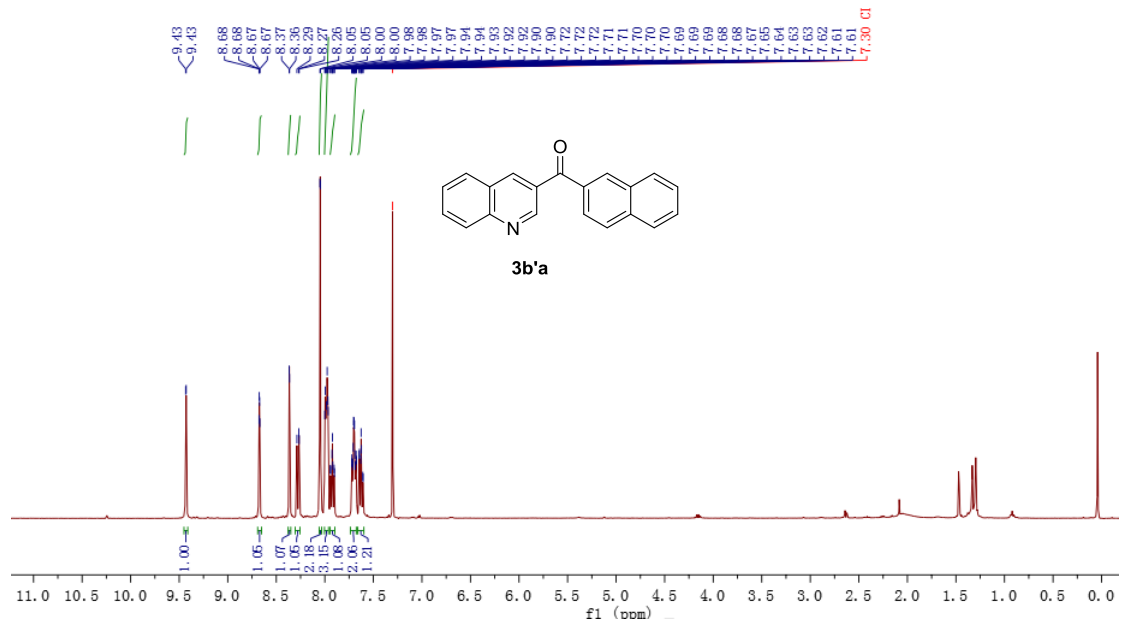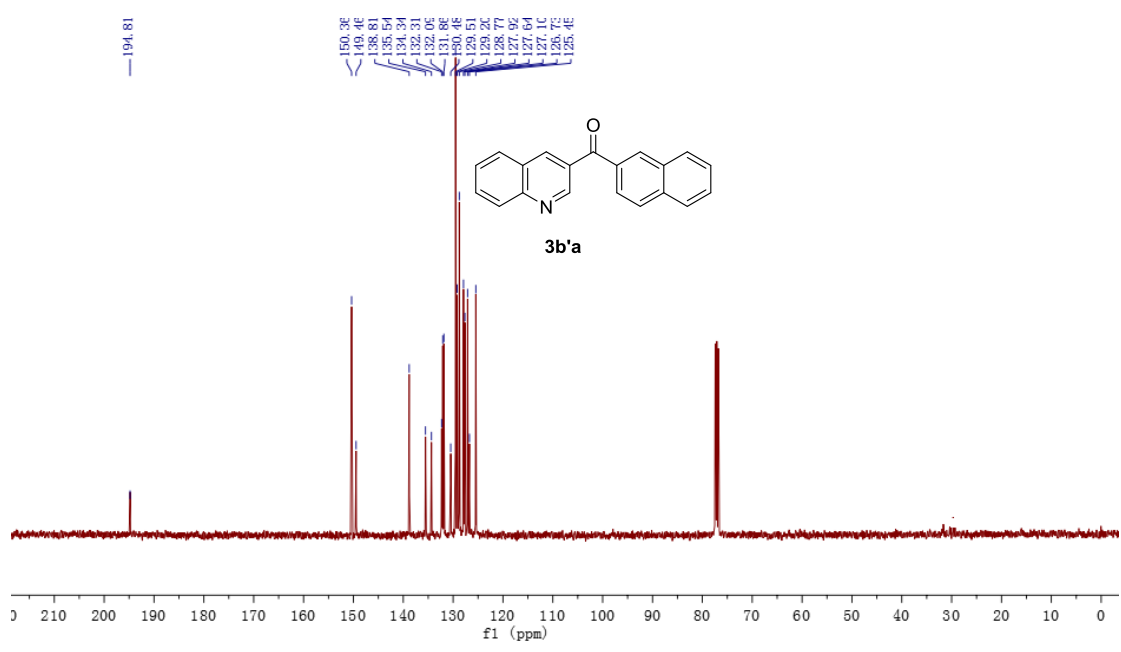



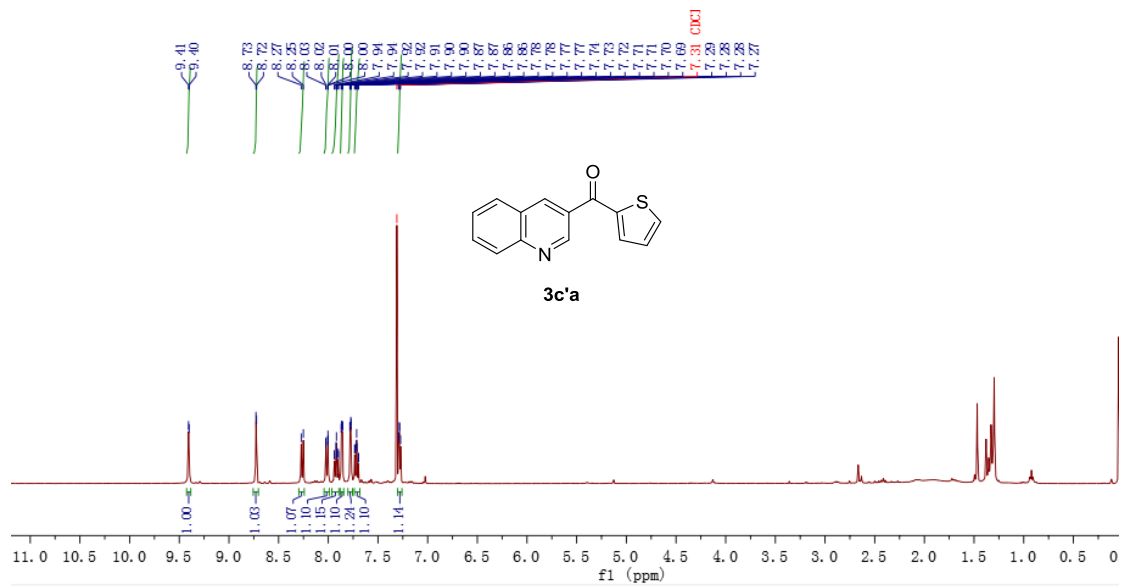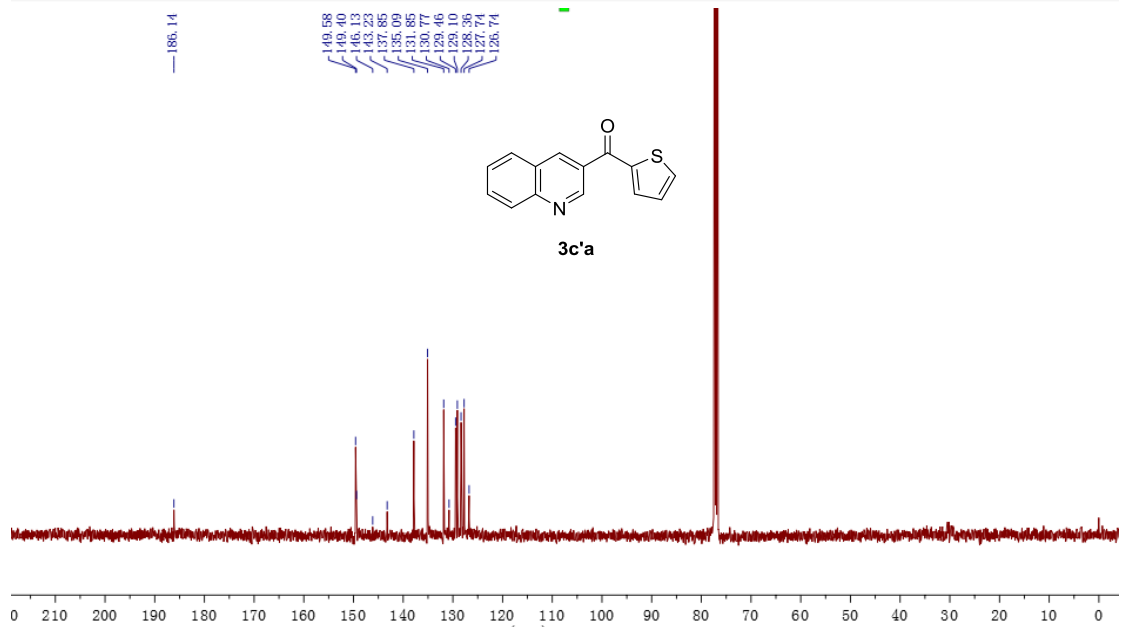

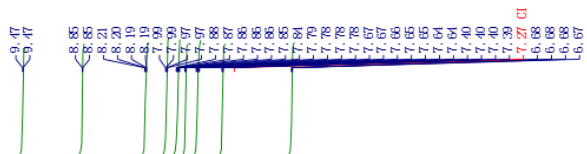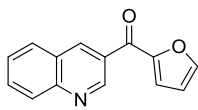

3d'a

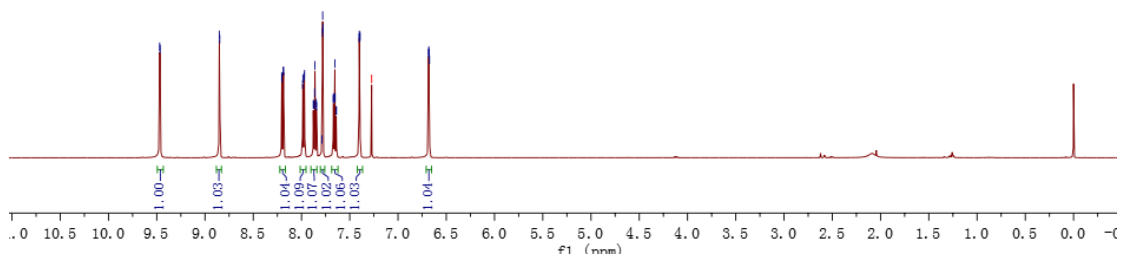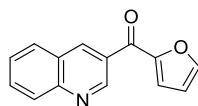

3d'a

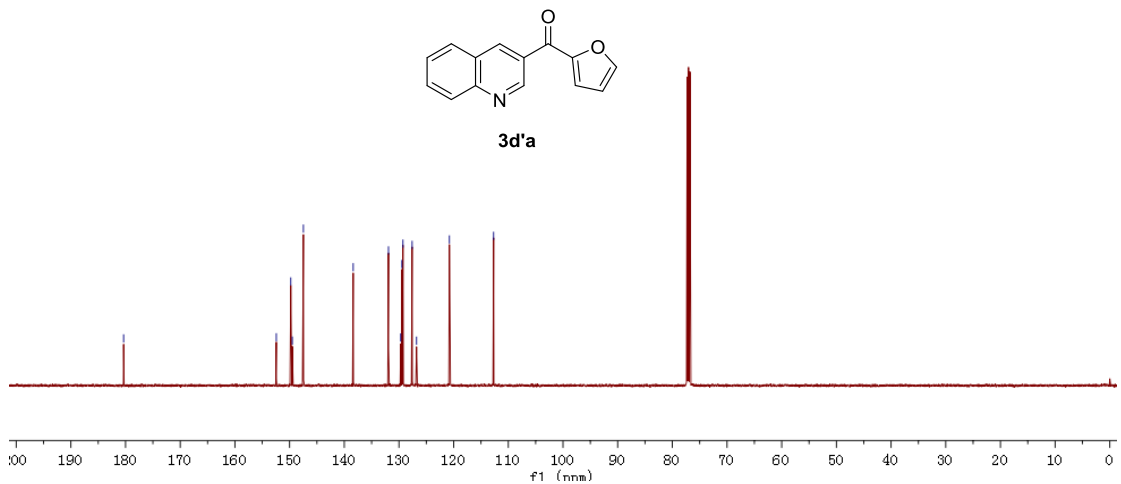

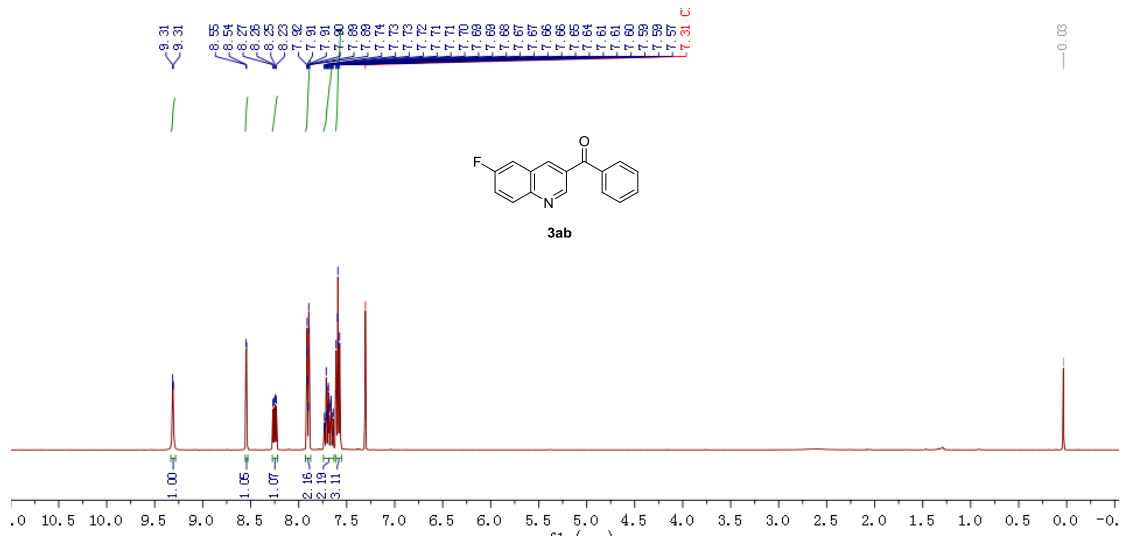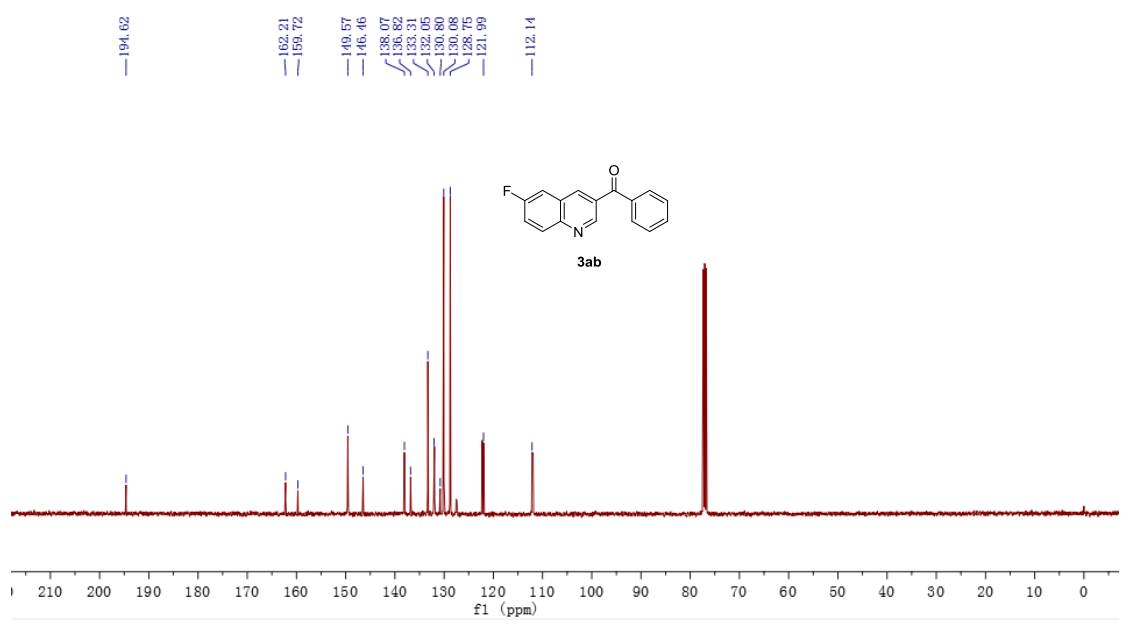

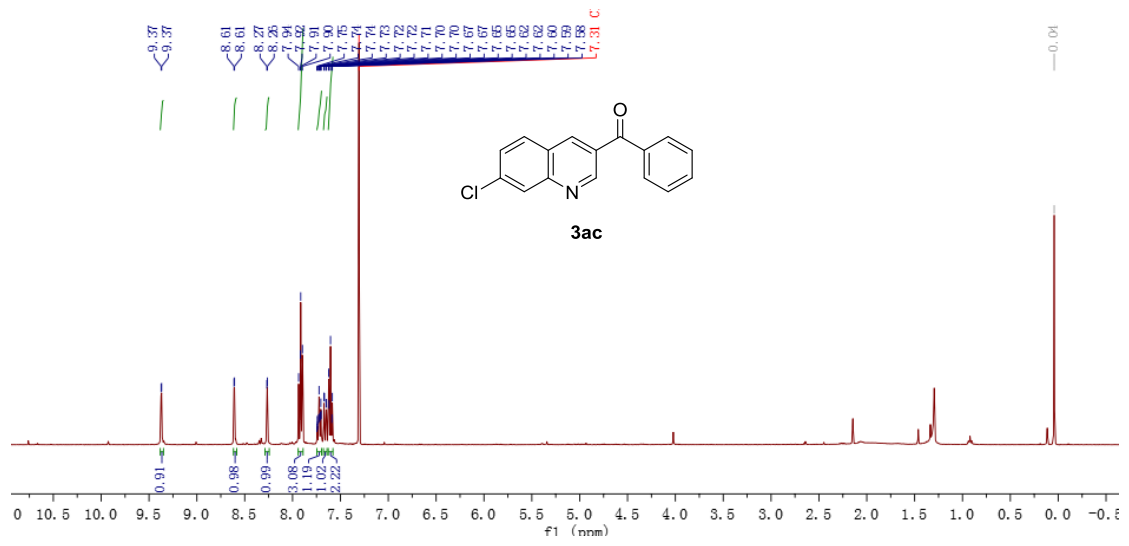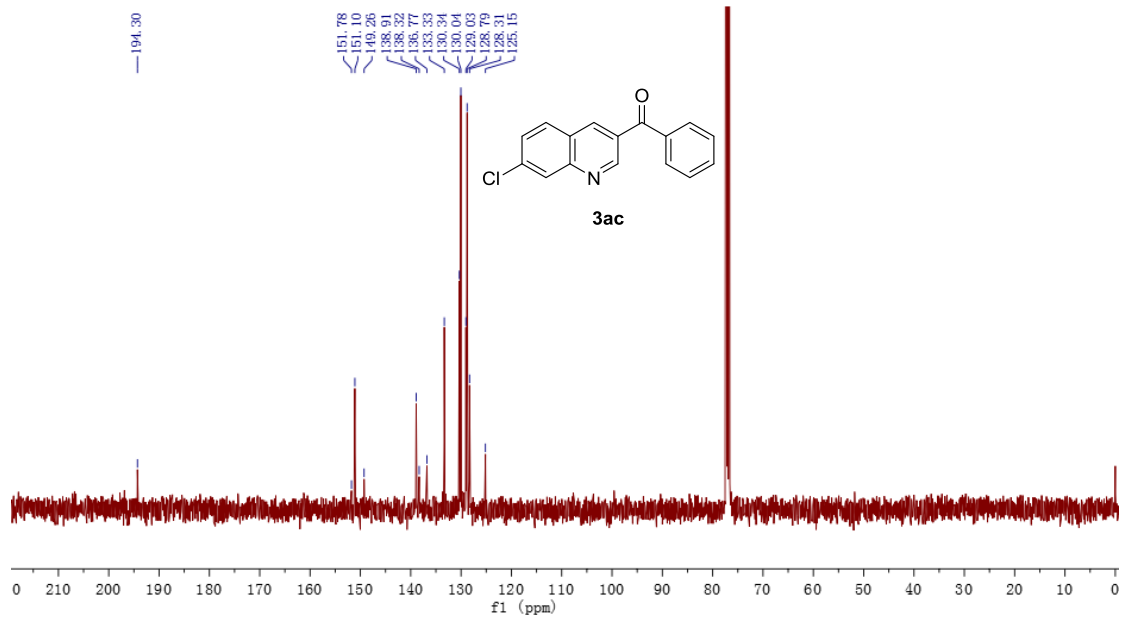

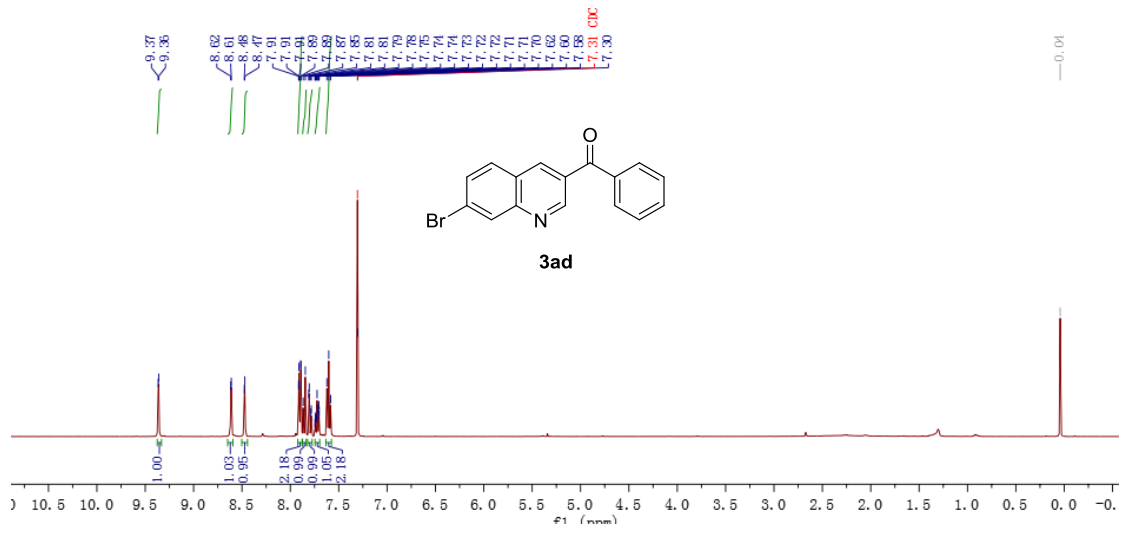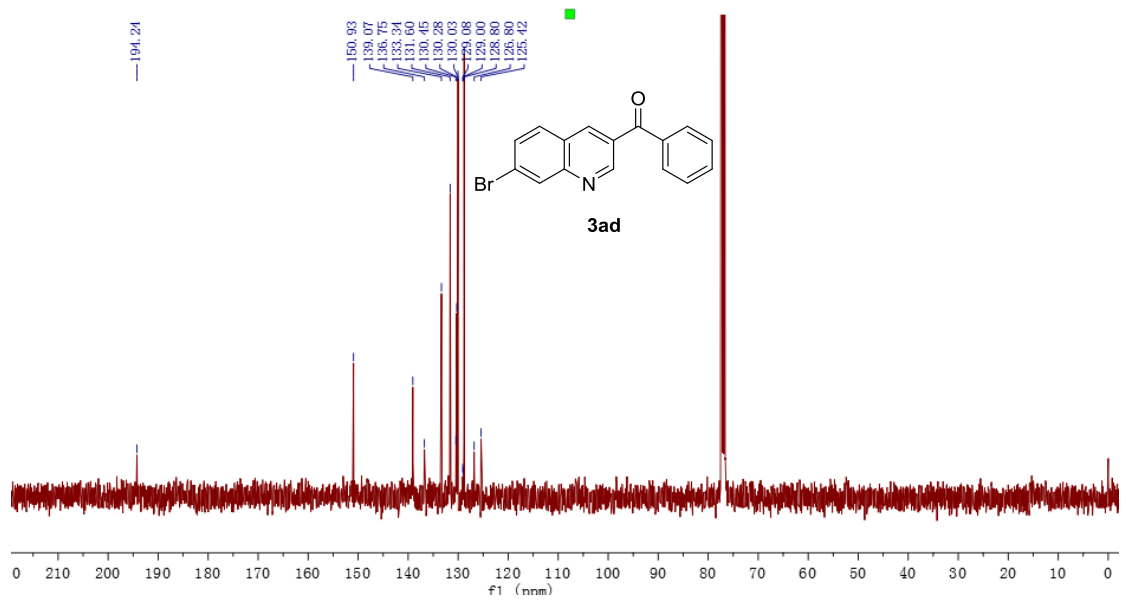

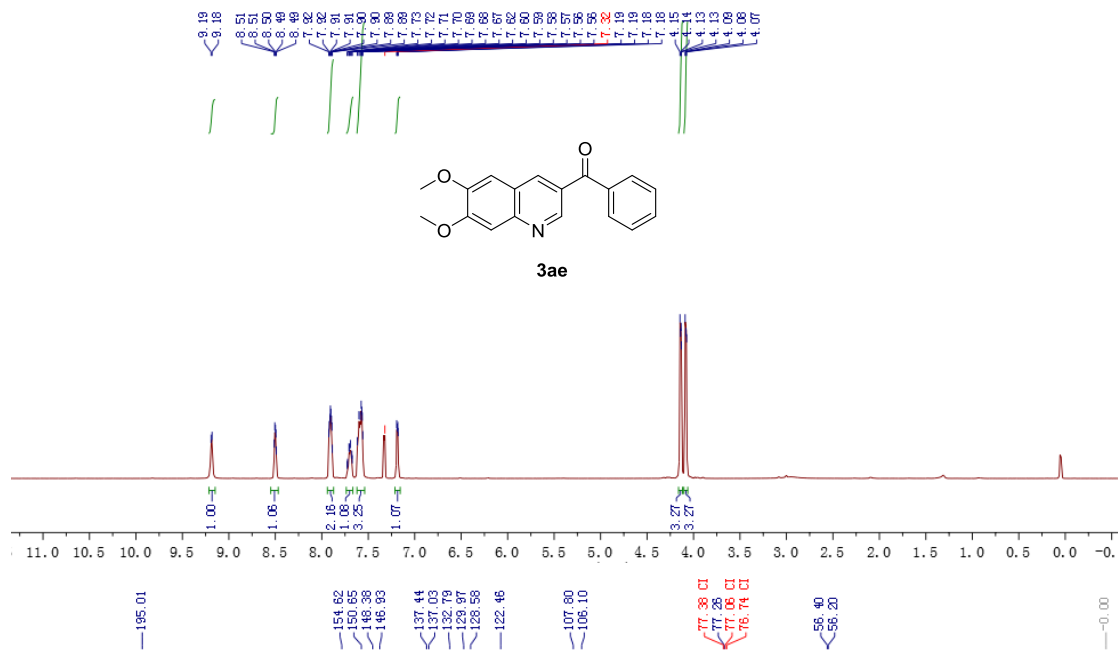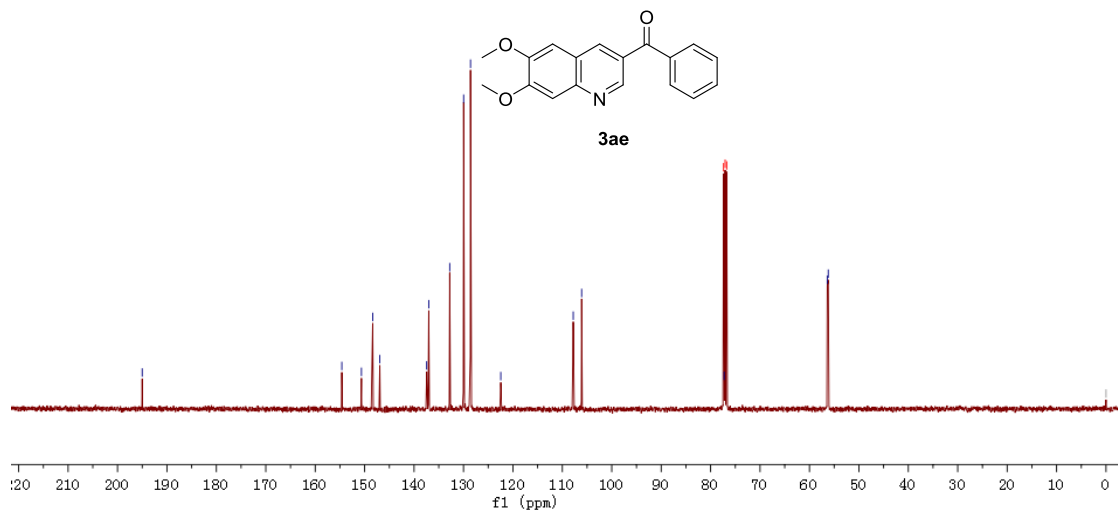

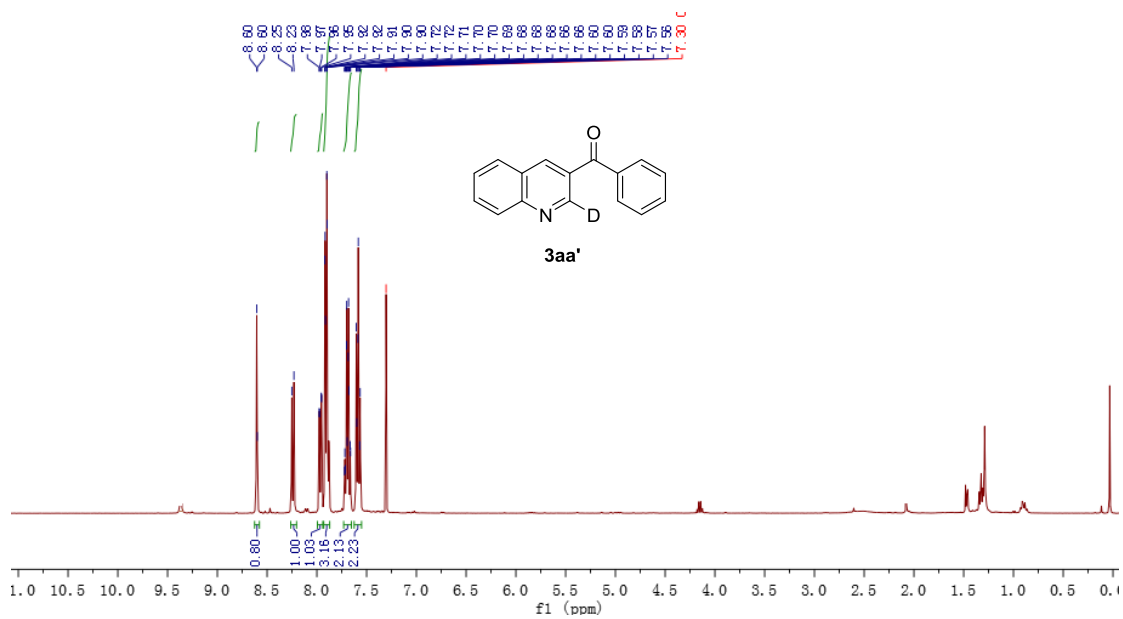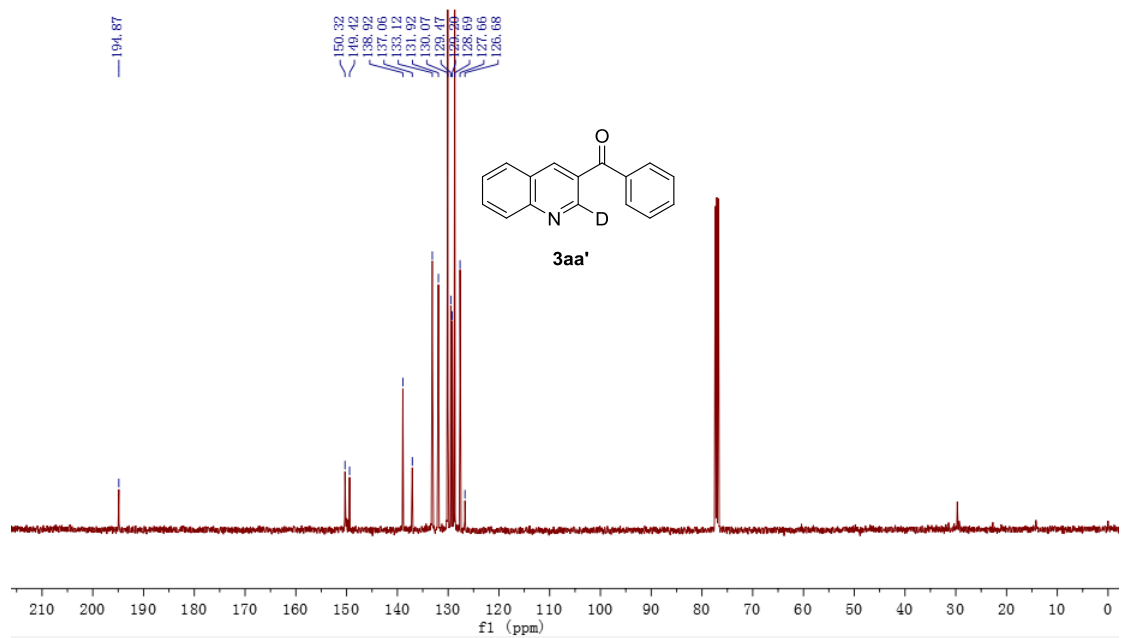

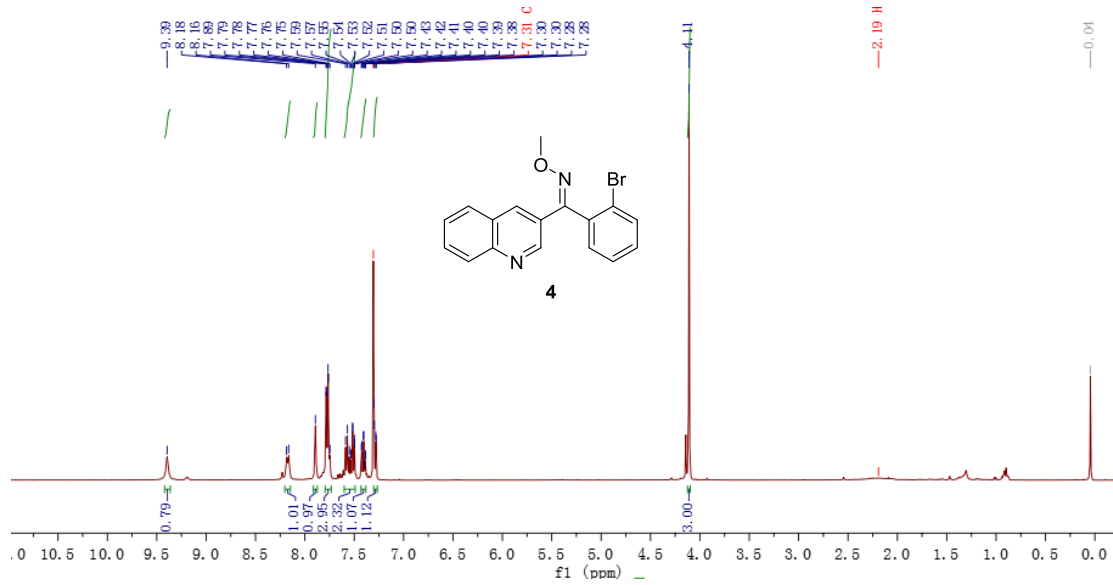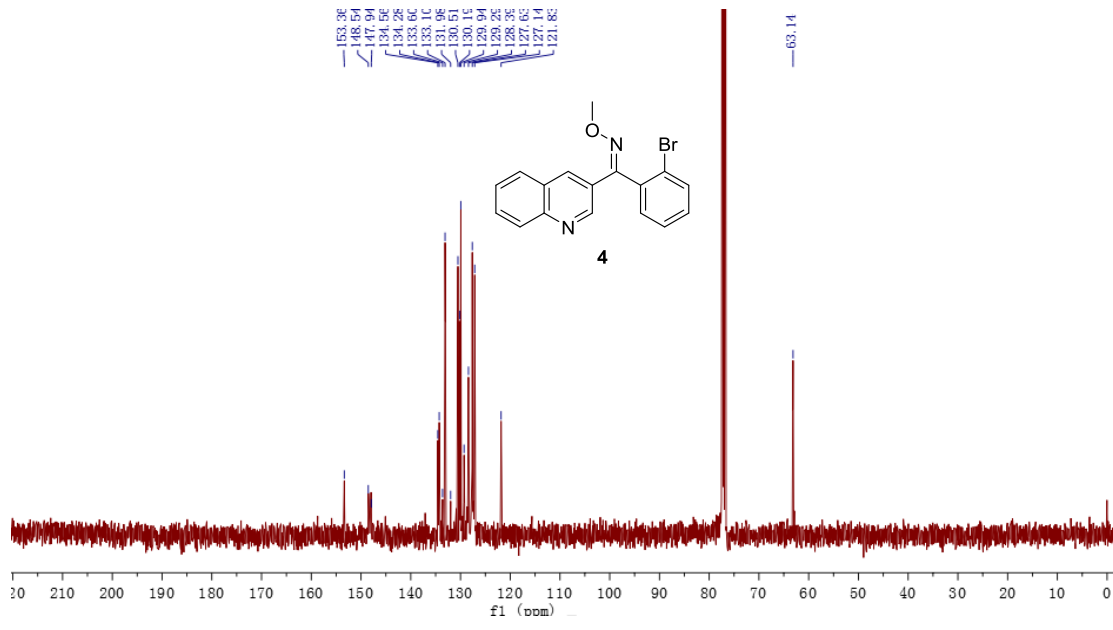

Supplement: c9ra01481k1.pdf [file c9ra01481k1.pdf]
